# Supplementary material
Source: publisher figshare collection journal article supplement (https://frontiersin.figshare.com/ndownloader/files/22071966)
Supplement: Supplementary file 1 [file 22071966]

## Sheet: Title Page
Database of authority of second-tier governments to reduce deforestation in 30 tropical countries
Version 1.0 (January, 2020)
Authors: Oyut Amarjargal and Jonah Busch, Earth Innovation Institute, San Francisco, CA
Citation: Busch, J., Amarjargal, O. (2020). “Authority of second-tier governments to reduce deforestation in 30 tropical countries.” Frontiers in Forests and Global Change. doi: 10.3389/ffgc.2020.00001.
Correspondence: jbusch@earthinnovation.org
Contents:
1. Title Page
2. Simplified Authorities (0 or 1)
3. Elaborated Authorities (Descriptions)
4. Citations

## Sheet: Simplified Authorities (0 or 1)
					General authorities					Forest-related authorities
Country	Score	Projected emissions from deforestation (tCO2), 2020-2050 (Busch et al, 2019)	Cumulative share of projected tropical emissions from deforestation	Number of second-tier jurisdictions	Elections	Taxation	Budgets	Police	Courts	Land ownership	Agricultural permits	Mining permits	Logging permits	Roads	Protected areas	Indigenous affairs	Spatial planning	Development planning
					15/30	25/30	23/30	4/30	13/30	3/30	12/30	6/30	11/30	21/30	8/30	8/30	16/30	27/30
Brazil	12/14	5.76885e+10	0.246356	26 States, 1 Federal District	1	1	1	1	1	1	1	0	1	1	1	0	1	1
Indonesia	12/14	3.10907e+10	0.379128	34 Provinces	1	1	1	0	1	0	1	1	1	1	1	1	1	1
Democratic Republic of the Congo	7/14	2.13417e+10	0.470266	26 Provinces	1	1	1	0	0	0	1	0	0	1	0	1	0	1
Bolivia	3/14	1.16283e+10	0.519924	9 Departments	0	0	0	0	1	0	0	0	0	1	0	0	0	1
Colombia	6/14	1.12311e+10	0.567886	32 Departments, 1 Capital District	1	1	1	0	0	0	0	0	0	1	0	0	1	1
Peru	10/14	9.64438e+09	0.609072	25 Regions	1	1	1	0	0	0	1	1	1	1	0	1	1	1
Papua New Guinea	10/14	7.6641e+09	0.641801	20 Provinces, 1 Autonomous Region, 1 District	1	1	1	0	0	0	1	0	1	1	1	1	1	1
Venezuela	4/14	7.30878e+09	0.673013	23 States, 1 Capital District, 1 Federal Dependency	1	1	1	0	0	0	0	1	0	0	0	0	0	0
Malaysia	12/14	5.71659e+09	0.697425	13 States	1	1	1	0	0	1	1	1	1	1	1	1	1	1
Zambia	6/14	5.39865e+09	0.72048	10 Provinces	0	1	1	0	0	0	1	0	0	1	0	0	1	1
Republic of Congo	5/14	5.30777e+09	0.743147	12 Departments	0	0	1	0	0	0	1	0	0	1	0	0	1	1
Angola	2/14	5.27405e+09	0.765669	18 Provinces	0	0	0	0	1	0	0	0	0	0	0	0	0	1
Mexico	7/14	5.17241e+09	0.787758	32 States, 1 Federal District	1	1	0	1	1	0	0	0	0	0	1	0	1	1
Myanmar	6/14	4.98043e+09	0.809027	7 Regions, 7 States, 1 Union Territory	0	1	1	1	1	0	0	0	0	1	0	0	0	1
Central African Republic	1/14	4.13546e+09	0.826687	16 Prefectures	0	1	0	0	0	0	0	0	0	0	0	0	0	0
Vietnam	8/14	3.56963e+09	0.841931	58 Provinces, 5 Municipalities	0	1	1	0	1	0	0	0	1	1	1	0	1	1
Thailand	4/14	3.40625e+09	0.856477	76 Provinces	0	1	1	0	0	0	0	0	0	1	0	0	0	1
Cameroon	4/14	3.35997e+09	0.870826	10 Regions	0	1	1	0	0	0	0	0	0	1	0	0	0	1
Philippines	7/14	3.08376e+09	0.883995	81 Provinces	1	1	1	0	0	0	0	0	0	1	1	0	1	1
India	14/14	3.00928e+09	0.896846	29 States, 7 Union Territories	1	1	1	1	1	1	1	1	1	1	1	1	1	1
Cambodia	4/14	2.964e+09	0.909503	24 Provinces, 1 Municipality	0	1	1	0	1	0	0	0	0	0	0	0	0	1
Tanzania	6/14	2.83153e+09	0.921595	31 Regions	1	1	1	0	0	0	0	0	1	0	0	0	1	1
Laos	8/14	2.80025e+09	0.933554	17 Provinces, 1 Prefecture	0	1	1	0	1	0	1	0	1	1	0	1	0	1
Mozambique	8/14	2.57796e+09	0.944563	11 Provinces	0	1	1	0	1	0	1	0	1	1	0	0	1	1
Guyana	4/14	2.53222e+09	0.955376	10 Regions	1	1	1	0	0	0	0	0	0	0	0	0	0	1
China	8/14	2.29347e+09	0.965171	31 Provinces	0	0	0	0	1	0	1	1	1	1	0	1	1	1
Gabon	1/14	2.2175e+09	0.97464	9 Provinces	0	1	0	0	0	0	0	0	0	0	0	0	0	0
Ecuador	7/14	2.1595e+09	0.983862	24 Provinces	1	1	1	0	1	0	0	0	0	1	0	0	1	1
Madagascar	2/14	1.89173e+09	0.991941	22 Regions	1	0	0	0	0	0	0	0	0	0	0	0	0	1
Suriname	4/14	1.88717e+09	1	10 Districts	0	1	1	0	0	0	0	0	0	1	0	0	0	1

## Sheet: Elaborated Authorities
							General authorities					Forest-related authorities
Country	Projected emissions from deforestation (tCO2), 2020-2050 (Busch et al, 2019)	Cumulative share of projected tropical emissions from deforestation	Number of second-tier jurisdictions	Number of third-tier jurisdictions	Number of fourth-tier jurisdictions	Government Levels	Second-tier government elected by the people?	Second-tier government can raise own tax revenue	Second-tier government can determine own budget	Second-tier government has own police	Second-tier government has own court system	Second-tier government owns (some) land or forest	Second-tier government has authority to issue permits for agriculture	Second-tier government has authority to issue permits for mining/hydrocarbon	Second-tier government has authority to issue permits for logging	Second-tier government has authority to issue permits for Road infrastructure	Second-tier government has authority to declare protected area	Second-tier government has authority to recognize indigenous territories or affairs	Second-tier government conducts independent spatial planning-land use planning-ecological zoning	Second-tier government conducts independent development planning
Brazil	5.76885e+10	0.246356	26 States and 1 Federal District "26 states (estados, singular - estado) and 1 federal district* (distrito federal)" (The World Factbook, 2018)	5,570 Municipalities The 5 570 municipalities are not a creation of the states and are not governed by them as it is the case in most federations. They are granted the status of federal entities, at the same level as the states and are governed by an organic law, which must comply with federal and state constitutions" (OECD, 2016).	~8000 Districts "Municipalities are subdivided into districts (around 8 000 in total), which are deconcentrated municipal localities" (OECD, 2016).	1 = National 2 = States 3 = Municipalities 4 = Districts	Yes "Each of Brazil's 26 states has its own constitution and popularly elected legislature and governor" (Nations Encyclopedia, 2019)	Yes " The states collect and administer the main VAT (Impostos sobre Comercialização de Mercadorias e Serviços or ICMS), which represent almost 80% of their tax revenue. They also receive the tax on motor vehicle and tax on heritage. States are free – within limits – to set tax rates and bases of all these taxes" (OECD, 2016). "Article 24 specifies the areas in which the federal government, the s…	Yes "Article 24 specifies the areas in which the federal government, the states, and the Federal District are entitled to legislate concurrently, such as taxation, finance, the penal system, the economy and urbanism, budgeting, costs of the judicial system, production and consumption, forestry, hunting, fishing, environment, education, social security, health and public health, the handicapped, p…	Yes "Penal law and procedure are established at federal level and applied across the entire country, but the institutions of the criminal justice system that enforce the law fall under the aegis of the 26 states and federal district. Each state organises and funds its own courts, prison system and police as established by the federal constitution. The state police force is in turn divided into th…	Yes "The Brazilian justice system consists of the supreme federal court; the superior court of justice; courts of appeal; federal regional, district, state, and territory courts; labor courts; electoral courts; and military courts (UN-Habitat 2005)" (Landlinks, 2011).	Yes "The property of the States includes: I. surface or underground waters, whether flowing, emerging or in reservoirs, with the exception, in the latter case, as provided by law, of those resulting from works carried out by the Union; II. ocean and coastal island areas that are under their dominion, excluding those under the dominion of the Union, counties or third parties; III. river and lake i…	Yes "State Government (executive institutions/bodies): State Land Institutes – responsible for establishing state rural settlements, managing public/state lands, regularization and titling of quilombolas. Environmental Agencies – responsible for proposing, implementing, managing, protecting, inspecting, and monitoring state protected areas. Also responsible for the environmental control, law enfo…	No "The Constitution states that the mineral resources, oil, gas, and other resource deposits belong to the federal government, which retains the right to prospect, drill, and exploit these fields. It retains the authority to grant concessions for exploration and mining of mineral resources" (Landlinks, 2011).	Yes "In terms of granting licenses to timber industries, responsibilities are divided between agencies based on the scale of activities. Resolution 237/1998 of the CONAMA grants it the responsibility to issue licenses for timber harvesting. However, IBAMA (federal government) is responsible for licensing activities with nationwide impacts. States and municipalities license activities with impacts…	Yes "State governments are responsible for maintaining state highway systems, low-cost housing programs, public infrastructure, telephone companies, and transit police" (Hudson, 1998).	Yes "MANG_AUTH: Secretario de Estado de Meio Ambiente de Mato Grosso" (World Database on Protected Areas, UN Environment, 2017) "State Government (executive institutions/bodies): Governor - responsible for creating state protected areas" (Damasceno et al, 2017). "States can declare protected areas on state land and feds on federal" (David McGrath, personal communication, June 6, 2019). "Between 2…	No "The National Indian Foundation (FUNAI), subordinate to the Directorate of Land Affairs under the Ministry of Justice, has the responsibility for managing indigenous lands. "The Ministry of Agrarian Development, through INCRA, is responsible for the identification, recognition, delimitation, demarcation, and titling of lands occupied by quilombo communities. The Constitution also guarantees ow…	Yes "Spatial planning in Brazil, be it at national, regional or urban scale, has the leadership of the federal government, although, as a federative republic, the federal government, the 27 states, and the roughly 5,400 local governments have to share responsibilities on this matter" (Farret, 2012). "Spatial planning and land use donation occurs at the state level" (David McGrath, personal commun…	Yes "Article 24 specifies the areas in which the federal government, the states, and the Federal District are entitled to legislate concurrently, such as taxation, finance, the penal system, the economy and urbanism, budgeting, costs of the judicial system, production and consumption, forestry, hunting, fishing, environment, education, social security, health and public health, the handicapped, p…
Indonesia	3.10907e+10	0.379128	34 Provinces "Significant powers now rest with the local-government level (410 districts and 98 cities), and to a lesser extent with the country’s 34 provinces, including for natural resource management" (p.1, Ardiansyah et al (2015))	410 Districts 98 Cities "Significant powers now rest with the local-government level (410 districts and 98 cities), and to a lesser extent with the country’s 34 provinces, including for natural resource management" (p.1, Ardiansyah et al (2015)	-	1 = National 2 = Provincial autonomous sub-national governments 3 = District and city autonomous ("local") sub-national governments	Yes "According to Butt (2010, 180), each of these three levels of government is to: have its own regional government (executive) and parliament with elected members; manage and regulate the activities of government, as an expression of autonomy or in assisting the central government; and have democratically-elected governors (for provinces), district heads (for districts) and mayors (for cities)"…	Yes "For provincial governments: Economic autonomy; by designing their own budgets (ruled by peraturan daerah provinsi or provincial regulations) and having a far larger share of revenue, including from funds to support their deconcentration roles and other revenues generated within their borders (e.g. their own source revenues from direct collection of local taxes and levies and other intergover…	Yes "For provincial governments: Economic autonomy; by designing their own budgets (ruled by peraturan daerah provinsi or provincial regulations) and having a far larger share of revenue, including from funds to support their deconcentration roles and other revenues generated within their borders (e.g. their own source revenues from direct collection of local taxes and levies and other intergover…	No "As a national police force, the INP [Indonesia National Police] is headquartered in Jakarta and has subordinate headquarters at provincial level. These in turn have subordinate headquarters in major urban centres (22 Polwil) and at district (285 Polres) and sub-district (3300 Polres) levels that link the police with all levels of the civil administration and the community" (ICG, 2001).	Yes "Supreme Court, Constitutional Court, Provincial Courts, Local Courts" (p.10, Ardiansyah et al (2015)).	No "According to the amended Constitution, resources under public domain – such as land important for public purposes – are “under the powers of the state” (under the control of the state) and in some cases can be considered state-owned property. Paragraph 33(3) of the amended Constitution clearly stipulates that “the land, the waters and the natural resources within them shall be under the power…	Yes "Bupati has the authority to issue permits (Izin Usaha Perkebunan/IUP) for agriculture within their jurisdiction. Governor has the authority to issue permits for cross-districts license" (Suwarno et al, 2015). "[Ministry of Agrarian and Spatial Planning ) Authority to accept land registration. Authority to issue land ownership (no longer for permits for opening up land, which was given to dis…	Yes "Provincial government, in this case governor, can issue IUP Eksplorasi (Izin Usaha Pertambangan Eksplorasi/Exploration Mining License) for specific cases" (Regulation of Minister of Energy and Mineral Resource No. 34/2017). " [Ministry of Energy and Mineral Resource] Authority to issue mining permits for mining concessions nationwide (for oil and gas) and within inter- provincial areas (geot…	Yes "Company should have the recommendations from the governor before they can request a license (IUPHHK) for timber, plantation forest or restoration ecosystem" (Law No. 23 of 2014 on Regional Governance). "In general, logging concession permits (known previously as hak pengusahaan hutan, or HPHs, and currently as IUPHHKs) for state forests are issued by the MoF (now MoEF [Ministry of Environmen…	Yes "For provincial governments: Political autonomy,” by having democratically-elected government heads (governors), their own governments (executive) and parliaments with elected members, and lawmaking authority in a number of fields of governance. These fields are development planning and control; spatial planning, use and monitoring; peace and order; public facilities and infrastructures" (p.8…	Yes (World Database on Protected Areas, UN Environment, 2017) "Provincial government Authority to manage cross-district protection forests and other relevant natural protected areas. Authority to manage permits covering cross-district protection forests" (p.74, Ardiansyah et al (2015)).	Yes "As stipulated in the Regulation of the MoASP No. 10/2016 on procedures for establishing communal rights over costumary lands and community lands within a certain area, customary communities should submit applications for the formal recognition of communal rights over customary lands to the district/city head or governor, which, upon verification, could determine the existence of customary co…	Yes "For provincial governments: Political autonomy,” by having democratically-elected government heads (governors), their own governments (executive) and parliaments with elected members, and lawmaking authority in a number of fields of governance. These fields are development planning and control; spatial planning, use and monitoring; peace and order; public facilities and infrastructures" (p.8…	Yes "For provincial governments: Political autonomy,” by having democratically-elected government heads (governors), their own governments (executive) and parliaments with elected members, and lawmaking authority in a number of fields of governance. These fields are development planning and control; spatial planning, use and monitoring; peace and order; public facilities and infrastructures" (p.8…
Democratic Republic of the Congo	2.13417e+10	0.470266	26 Provinces (The World Factbook, 2018)	No more districts (Personal communications, Sébastien Desbureaux)	33 Cities and 145 Territories (Personal communications, Sébastien Desbureaux)	1 = National 2 = Provinces 4 = Cities/Territories	Yes "Elected provincial deputies. Provincial Members Elect Governor Appointing Provincial Government" (Personal communications, Sébastien Desbureaux) "The President of the Republic invests by ordinance the elected Governors and Vice Governors of the Provinces, within a time period of fifteen days in accordance with Article 198. The Provincial Government consists of a Governor, of a Vice Governor …	Yes "Without prejudice to the other provisions of this Constitution, the following matters are of the exclusive competence of the Provinces: provincial and local taxes, and duties and assessments [droits], notably property tax, tax on local revenue and the tax on motor vehicles. Without prejudice to the other provisions of this Constitution, the following matters are of the concurrent competence …	Yes "Local governments endowed with autonomy to prepare and execute their own budgets - DRC - Yes" (UNDP, 2018). "The Law of Finance determines the resources and the expenditures of the State... The Bill of the Annual Law of Finance, which includes notably the budget, is deposited by the Government with the Bureau of the National Assembly, at the latest, on the fifteenth of September of each year…	No "The national police consists of 110,000–150,000 officers and operates on the provincial level, answering to the Interior Ministry" (Digital Congo, 2018).	No "subordinate courts: State Security Court; Court of Appeals (organized into administrative and judiciary sections); Tribunal de Grande; magistrates' courts; customary courts" (The World Factbook, 2018).	No "The 1973 General Property Law (Law No. 73-021), as amended, provides for state ownership of all land, subject to rights of use granted under state concessions. Under formal law, the state owns all the land in the DRC; people and entities desiring use-rights to land can apply for concessions in perpetuity or standard concessions" (Landlinks, 2010).	Yes "Without prejudice to the other provisions of this Constitution, the following matters are of the exclusive competence of the Provinces: the drafting of agricultural and forestry programs and their execution in accordance to the norms of national planning, the assignment of agricultural personnel, [and] of the staff [cadres] in accordance with the provisions of the status of the career office…	No "The 2005 DRC Constitution provides that the country’s natural resources are for the enjoyment of all Congolese people, and that the state is responsible for ensuring that these resources are distributed equally. The government has the authority to grant concessions to land and other resources as authorized by law. The 2002 Mining Code (Law No. 007/2202 of 11 July) and Mining Regulations, enac…	No "The 2005 DRC Constitution provides that the country’s natural resources are for the enjoyment of all Congolese people, and that the state is responsible for ensuring that these resources are distributed equally. The government has the authority to grant concessions to land and other resources as authorized by law" (Landlinks, 2010).	Yes "Without prejudice to the other provisions of this Constitution, the following matters are of the concurrent competence of the Central Power and the Provinces: road traffic, automotive traffic [circulation], the construction and maintenance of routes of national interest, the collection and distribution of tolls for the use of routes constructed by the Central Power and/or by the Province" (C…	No [Does not exist in World Database on Protected Areas] "The Ministry of the Environment, Nature Conservation, and Tourism (MECNT) is responsible for the forest sector, including environmental protection, the conservation of nature, and forest harvesting...The Directorate of Natural Resource Management is responsible for the normative aspects of forest management and resource allocation, and the…	Yes "It is held in each chief town of sector or chieftaincy and in each urban-rural commune a book of identification of local communities, in which it is listed any local community wishing to acquire part or all of the protected forest that she owns under custom. The identification of the local community is done by completing the following formalities: the written request addressed to the governo…	No "With support from USAID/CARPE and the US Forest Service, the DRC created an inter-ministerial commission for land use planning, drafted a forest land use planning guide, and is actively working to create a process to allocate forest use according to the forest code and participatory principals of local authorities and communities. The Ministry of Environment, Nature Conservation and Tourism (…	Yes "Without prejudice to the other provisions of this Constitution, the following matters are of the exclusive competence of the Provinces: the development plan of the Province" (Constitute Project, 2018).
Bolivia	1.16283e+10	0.519924	9 Departments (The World Factbook, 2018)	94 Provinces "In 1989 Bolivia was divided into nine departments, which were subdivided into ninety-four provinces" (Rex et al, 1991).	312 Municipalities (Rex et al, 1991)	1 = National 2 = Departments 3 = Provinces 4 = Municipalities Other: Native Indigenous peasant territories	No " In each Department, the Executive Branch is responsible for and administered by a Prefect, who is appointed by the President of the Republic" (Organization of American States, "Legal System of Bolivia").	No "Prefectures are simultaneously local government entities yet are also viewed as units of central government, for only the central government and municipalities can levy taxes in Bolivia" (Seeman, 2004).	No "Moreover, the role of the regional council [council members indirectly elected from district of municipalities and works with the prefecture] is minimal; it approves the budget, but there is not much to approve, at least on the income side, since prefectures collect no taxes of their own. Although, the de - concentration Law states very clearly: “in each region, a Prefect designated by the Pr…	No "Police: Subordinate to Ministry of Interior, Migration, and Justice" (Rex et al, 1991).	Yes "subordinate courts: National Electoral Court; District Courts (in each of the 9 administrative departments); agro-environmental lower courts" (The World Factbook, 2018).	No "Under the 2009 Constitution and the Forest Act of 1996, the government owns Bolivia’s state forests and nationally protected areas. Under customary law, forests in Bolivia belong to the community. The community closest to the forestland is entitled to use the forest products, including firewood, fruit, and medicinal plants" (Landlinks 2011).	No "Bolivia’s Vice-Ministry of Land, located within the Ministry of Rural Development, Agriculture and the Environment, is responsible for land policy, norms, and strategy. The National Institute for Agrarian Reform (INRA) is a public decentralized institution within the Ministry for Sustainable Development and Planning and is affiliated with the Ministry of Rural Development, Agriculture and the…	No "The 2009 Constitution provides that the state owns and is responsible for all mineral resources found in the soil and subsoil, and establishes the state’s rights to contract with mining companies and to supervise and control the production chain of all mineral resources. "The government can grant concessions that confer on individuals and entities the right to explore for and extract minerals…	No "The natural forests and woodlands are strategic for the development of the Bolivian people. The State shall recognize the rights to exploit the forests for the benefit of communities and individual traders" (Constitute Project, 2018). "Owners of private forests have the right to exploit the forest resources on their land, subject to the requirement of a forest management plan. Timber harvesti…	Yes "Furthermore, the transfer of additional responsibilities to the new prefecture[overseer of department] administrations also includes, secondary roads, rural electrification, production support, technical assistance and environmental protection" (Seeman, 2004).	No "MANG_AUTH/MANG_PLAN: Not reported" (World Database on Protected Areas, UN Environment, 2017) "The 2009 Constitution calls on the state to guarantee the conservation and sustainable use of the forests and establish measures to protect and restore biodiversity. The Vice-Ministry of Biodiversity, Environment, Climate Change and Forest Development and Management, together with the Authority for F…	No "The Constitution also gives indigenous communities located within forest areas the exclusive right to exploit, in accordance with the law, forest resources within those areas. The government grants Local Social Association (Agrupación Social del Lugar, or ASL) concessions in municipal forest areas to groups of 20 or more rural people who have proved that they previously had been using the for…	No "The creation of departmental councils elected by municipal councilors of all municipalities. The most important roles of the departmental councils are to oversee the departmental development plans, programs and projects, to approve the prefecture’s annual pre-financial plan, to control the management of prefecture authorities and to promote coordination with the municipal governments" (Seeman…	Yes "The creation of departmental councils elected by municipal councilors of all municipalities. The most important roles of the departmental councils are to oversee the departmental development plans, programs and projects, to approve the prefecture’s annual pre-financial plan, to control the management of prefecture authorities and to promote coordination with the municipal governments" (Seema…
Colombia	1.12311e+10	0.567886	32 Departments and 1 Capital District "32 departments (departamentos, singular - departamento) and 1 capital district* (distrito capital)" (The World Factbook).	1,123 Municipalities	-	1 = National 2 = Departments 3 = Municapilities	Yes "In each department there will be a popularly elected administrative body known as departmental assembly, which will be composed of no fewer than eleven (11) nor more than thirty-one (31) members. This body will enjoy administrative autonomy and have its own budget" (Constitute Project, 2019) "Governors of departments, once appointed by the president, are now elected" (Nations Encyclopedia, 2…	Yes "The departmental assemblies, by means of ordinances, exercise the following powers: Decree, in accordance with the law, the taxes and levies necessary for the execution of the departmental functions" (Constitute Project, 2019). "Taxes represent 30% of municipal revenues and around 20% for departments. Departmental tax revenues include receipts from the excise taxes (beer, tobacco, liquor i.e…	Yes "In each department there will be a popularly elected administrative body known as departmental assembly, which will be composed of no fewer than eleven (11) nor more than thirty-one (31) members. This body will enjoy administrative autonomy and have its own budget" (Constitute Project, 2019).	No "[Translated from Spanish to English] Objective and functions of the Minister: Direct the Military Forces and the National Police, in accordance with the Constitution and the Law" (Ministry of National Defense, 2015). "Chapter 7 of the Constitution is dedicated to the “Public Forces” (Fuerza Publica), which comprise the military and the national police. Article 218 defines the National Police …	No "subordinate courts: Superior Tribunals (appellate courts for each of the judicial districts); regional courts; civil municipal courts; Superior Military Tribunal; first instance administrative courts" (The World Factbook, 2018).	No "Land in Colombia is classified as state property owned by the nation; private property owned by individuals; and communal land, which is possessed by indigenous groups, Afro-Colombian communities, and cooperatives or groups of urban dwellers " (Landlinks, 2017). "[Translated from Spanish to English] ARTICLE 111.- Acquisition of Areas of Interest for Municipal Aqueducts. Declare of public inte…	No "Colombia has a National Land Agency (ANT) which is responsible for land regularization and formalization" (The World Bank, 2017). "Duque [President of Colombia] plans to abolish both the National Land Agency, established to provide land titles to small farmers, and the Agency for Territorial Renewal, created to administer rural development. He will instead allot their responsibilities to the …	No "All nonrenewable natural resources in Colombia belong to the state, which can undertake exploration and exploitation on its own or grant concession rights to private parties to undertake exploration and exploitation" (Landlinks, 2017).	No "Therefore, it is local environmental authorities, called Corporaciones Autonomas Regionales (CARs [subset of the Ministry of Environment]) that have considerable power and impact in environmental discourse. In Colombia, the CARs in each jurisdiction are in charge of managing and administering natural resources, as well as granting forest concessions for timber harvesting" (Global Forest Atlas…	Yes "The departmental assemblies, by means of ordinances, exercise the following powers: Enact the regulations connected with the planning, economic and social development, financial support of and borrowing to the municipalities, tourism, transportation, the environment, public works, means of communication, and development of their border areas" (Constitute Project, 2019).	No "GOV_TYPE: Sub-national ministry or agency [MANG_AUTH = Corporación Autónoma Regional del Centro de Antioquia, Corporación Autónoma Regional de Cundinamarca, Corporación Autónoma Regional de Santander, Corporación Autónoma Regional de Caldas, Corporación Autónoma Regional de Risaralda" (World Database on Protected Areas, UN Environment, 2017)	No "The configuration of the indigenous [Indian] territorial entities will be drawn subject to the provisions of the Organic Law of Territorial Planning, and their delimitation will be effected by the national government with the participation of the representatives of the indigenous communities following the plan of the Commission of Territorial Planning" (Constitute Project, 2019).	Yes "The cadastral function (i.e., mapping and valuation of land parcels and buildings) in Colombia is carried out by the Instituto Geográfico Agustín Codazzi (IGAC) and decentralized, autonomous cadastral agencies under supervision of IGAC in Bogota, Cali, Medellín and the province of Antioquia. IGAC is the entity responsible for producing the official map and the basic cartography of Colombia; …	Yes "The departments are responsible for planning and promoting the economic and social development of their territory" (OECD).
Peru	9.64438e+09	0.609072	25 regions "The administrative division of Peru is organized in 25 regions, 196 provinces, and 1,850 districts" (Woolcott et.al, 2016).	196 provinces "The administrative division of Peru is organized in 25 regions, 196 provinces, and 1,850 districts" (Woolcott et.al, 2016).	1850 districts "The administrative division of Peru is organized in 25 regions, 196 provinces, and 1,850 districts" (Woolcott et.al, 2016).	1 = National 2 = Regional 3 = Local Provinces 4 = Local Districts	Yes "Decentralized, unitary state 3 Levels of government: national, regional, and local. There are regional and municipal elections" (Dickovick, 2006).	Yes "Regional government revenues are obtained from: Taxes created in its favor" (p. 6, Fernandini and Sousa (2015)).	Yes "Regional and local governments are therefore required to promote public participation in the formulation, discussion and consensus-creation of budgets and development plans, as well as in public management. The main exclusive responsibilities/powers of local governments are the following: Approve their internal organization and institutional budget" (p.4, Fernandini and Sousa (2015)).	No "Only the Armed Forces and the National Police may possess and use weapons of war. Provincial and district municipalities are bodies of local government. Municipalities promote, support, and regulate citizen participation in local development. Additionally, they offer citizen security services in cooperation with the National Police of Peru, according to law" (Constitute Project, 2019).	No "Subordinate courts: Court of Constitutional Guarantees; Superior Courts or Cortes Superiores; specialized civil, criminal, and mixed courts; 2 types of peace courts in which professional judges and selected members of the local communities preside (The World Factbook, 2018).	No "The Peruvian Constitution states that all natural resources, including forests, belong to the State [central government]. The rights to all subsurface rights are held by the state in Peru, peasant and native communities do not own these rights" (Landlinks, 2016).	Yes "The regional governments, through the regional directorates of agriculture, are the authorities responsible for land titling [titling of agricultural lands]" (p.25, Fernandini and Sousa (2015)).	Yes "INGEMMET [Instituto Geológico Minero y Metalúrgico (Geological, Mining, and Metallurgical Institute). It is part of the Ministry of Energy and Mines (MEM)] Evaluates and grants mining concession titles for medium- and large-scale mining. Establishes the termination of mining concessions, according to the causes given by the mining law. Regional governments evalate and grant mining processing…	Yes "The DGFFS [central government] has the power to grant forest concessions over all regions, except for the powers transferred to the regional governments ... Regional governments Grants forest concessions in areas inside the regions where functions have been transferred [regional government]" (p. 46, Fernandini and Sousa (2015)).	Yes "Regional Governments Approve public transport infrastructure projects" (p.50, Fernandini and Sousa (2015)).	No [Does not exist in World Database on Protected Areas] "NPAs [Natural Protected Areas] and private conservation areas are created by supreme decrees endorsed by MINAM [Ministero del Ambiente (Ministry of the Environment)]. Natural Resources Department proposes the creation of regional conservation areas.h Authorization for the use of natural resources in regional conservation areas is granted b…	Yes "[Translated from Spanish to English] Since 1974, the demarcation and titling was implemented by officials of the Ministry of Agriculture and Irrigation (MINAGRI) and its offices in the regions, but since 2002 the functions to implement this process were transferred to the Regional Governments" (Monterroso et al, 2019). "The Peruvian government began awarding land title to indigenous communit…	Yes "The Environmental Law authorizes regional and local governments to coordinate their land use planning policies with each other and with the national government, considering the proposals formulated by civil society" (p. 18, Fernandini and Sousa (2015)).	Yes "The main exclusive powers of the regional government are to: Plan the integral development of its region" (p. 3, Fernandini and Sousa (2015)).
Papua New Guinea	7.6641e+09	0.641801	20 Provinces, 1 autonomous region, and 1 district (The World Factbook, 2018)	89 Districts "There are 20 provinces, the national capital area of Port Moresby, the autonomous region of Bougainville and 89 districts" (Commonwealth Local Government Forum, 2019).	326 LLGs (Humanitarian Data Exchange, 2019)	1 = National 2 = Provinces 3 = Districts 4 = Local-level government areas (LLGs)	Yes "All provinces have directly elected presidents" (Commonwealth Local Government Forum, 2019). "For each Provincial Government and Local-level Government, there shall be established— a mainly elective (elected directly or indirectly), legislature with such powers as are conferred by law" (Constitute Project, 2018).	Yes "Where an Organic Law provides for the imposition, collection and distribution by Provincial Governments and Local-level Governments of sales and service tax, it may also provide that the National Government has concurrent power to impose, collect and distribute sales and service tax" (Constitute Project, 2018).	Yes "Notwithstanding Subsection (4), powers conferred on the Commission in this section, does not include the power to give directives that prevent the implementation of Government's, including Provincial and Local-level Government's policies, directives, powers and functions aimed at achieving the economic, social, cultural and infrastructural development of the country, including the implementa…	No "The Police Force is subject to the control of the National Executive Council through a Minister" (Constitute Project, 2018).	No "subordinate courts: district, village, and juvenile courts, military courts, taxation courts, coronial courts, mining warden courts, land courts, traffic courts, committal courts, grade five courts" (The World Factbook, 2018).	No "PNG’s National Forest Plan was finalized in 1996. Hence forth, all forestry projects are expected abide by the Plan. Provincial forest management plans are also required and must be prepared by Provincial Forest Management Committees. The majority of PNG’s forests are held by communities and individual PNG clans, and there are still many large inaccessible areas of forests that fall outside o…	Yes "Where the Provincial Forest Management Committee, after having considered and evaluated an application, is of the opinion that it is satisfactory, it shall recommend to the Board to approve the application for a conversion of the forest to agriculture or other land use. Upon the recommendation of the Provincial Forest Management Committee and the consent of the Board [National Forest Board; …	No "Mining Tenements in Papua New Guinea: The Head of State, acting on advice from the National Executive Council issues the special Mining Lease whilst the Minister for Mining issues the other types of licences" (Mineral Resources Authority, 2019).	Yes "Small operations license: Small operators work under a Timber Authority system, not a license. Here, the Timber Authority allows operations to begin before all pre-requisites are completed or the license is issued. TAs are issued for selective logging operations focused on the domestic market. The TA is issued by the Chairman of the Provincial Forest Committee and subject to PNGFA approval" …	Yes "Local governments are responsible for water supply and have joint responsibility with provinces for roads, waste disposal, health and environmental protection" (Commonwealth Local Government Forum, 2019). "a Provincial Government shall, in addition to its other functions in relation to the province, be responsible for -- (i) maintenance of roads, bridges and infrastructures; (ii) urban roads…	Yes [Does not exist in World Database on Protected Areas] "Provincial Governments will assist with the implementation of this policy by supporting establishment and management of Protected Areas when developing their five-year development plans, annual budgets and land use plans. They will develop legislation (reflecting the National legislation) to gazette regional Protected Areas, implement the…	Yes "Of the land not under clan ownership, about 40 percent is freehold and the remainder held under lease from the government. Where clan land is required for commercial purposes the legitimate owners need to be identified. Internal migration and the vagueness of many traditional boundaries make this very difficult. There is no general provision for the registration of customary land. Some provi…	Yes "Each Provincial Government shall, as soon as practicable after the coming into operation of this Act, in consultation with the Provincial Forest Management Committee, and in conformity with the National Forestry Development Guidelines, draw up a Provincial Forest Plan" (Papua New Guinea Forest Industries Association, 2010).	Yes "In each province, LLGs compile their plans and budgets for submission to a district development authority. The implementation and oversight of the resulting five-year development plan is the principal responsibility of the provincial government, working with LLGs" (Commonwealth Local Government Forum, 2019).
Venezuela	7.30878e+09	0.673013	23 States, 1 Capital District, and 1 Federal Dependency (The World Factbook, 2018)	336 Municipalities	-	1 = National 2 = States 3 = Municipalities	Yes "The government and administration of each State corresponds to a Governor [masculine] or Governor [feminine]. To be governor [masculine] or Governor [feminine] it is required to be Venezuelan [masculine] or Venezuelan [feminine], greater than twenty-five years old and of secular estate. The Governor [masculine] or Governor [feminine] will be elected for a period of four years by the majority…	Yes "Is of the States exclusive competence: Organization, collection, control and administration of their own taxes, in accordance with provisions of national and state law. Each State shall have a Comptroller’s Office which shall enjoy structural and operating autonomy. The State Comptroller’s Office shall exercise, in accordance with this Constitution and in accordance with law, control, vigila…	Yes "The Legislative Power is exercised in each State by a Legislative Council composed of a number of not greater than fifteen nor less than seven members, who proportionally represent the population of the State and the Municipalities. The Legislative Council has the following attributions: To approve the Law of the Budget of the State" (Constitute Project, 2018).	No "Organization of the police and determination of the branches of this service to be assigned to municipal jurisdiction, in accordance with applicable national legislation" (Constitute Project, 2018).	No "subordinate courts: Superior or Appeals Courts (Tribunales Superiores); District Tribunals (Tribunales de Distrito); Courts of First Instance (Tribunales de Primera Instancia); Parish Courts (Tribunales de Parroquia); Justices of the Peace (Justicia de Paz) Network" (The World Factbook, 2018).	No "The governance and management of mines and hydrocarbons, the governance of vacant lands and the conservation, development and exploitation of forests, soil, water and other elements of the country’s natural wealth" (Constitute Project, 2018).	No "Three organisations under the Ministry of Agriculture and the Land (the Spanish acronym is MAT) are at the core of the actual process of land reform and agricultural transformation. The National Land Institute (INTI) is the key institution in respect of the implementation of land reform. Its task is to identify, administer and regulate landed property and to distribute land. INTI has a legal …	Yes "Is of the States exclusive competence:The governance and exploitation of non-metallic minerals that are not reserved to National Power, as well as salt deposits and oyster beds, and the management of vacant lands within their jurisdiction, in accordance with law. Is of the competence of the National Public Power: The governance and management of mines and hydrocarbons, the governance of vaca…	No "Forest management is largely centralized under the forest service, which is under the jurisdiction of the Ministry of the Environment and Natural Resources (MARN). MARN grants forest concessions for areas greater than 5,000 hectares and annual logging permits for smaller areas" (Global Forest Atlas, 2019). "Is of the competence of the National Public Power: The governance and management of mi…	No "To this end, the State shall promulgate such financial, commercial, technological transfer, land tenancy, infrastructure, manpower training and other measures as may be necessary to achieve strategic levels of self-sufficiency" (Constitute Project, 2018).	No [Does not exist in World Database on Protected Areas] "Is of the competence of the National Public Power: The governance and management of mines and hydrocarbons, the governance of vacant lands and the conservation, development and exploitation of forests, soil, water and other elements of the country’s natural wealth" (Constitute Project, 2018).	No "The State [national] recognizes the existence of native peoples and communities, their social, political and economic organization, their cultures, practices and customs, languages and religions, as well as their habitat and original rights to the lands they ancestrally and traditionally occupy, and which are necessary to develop and guarantee their way of life. It shall be the responsibility…	No "The State [national] shall develop a zoning policy taking into account ecological, geographic, demographic, social, cultural, economic and political realities, in accordance with the premises of sustainable development, including information, consultation and male/female participation by citizens. An organic law shall develop the principles and criteria for this zoning. The establishing, coor…	No "Is of the competence of the National Public Power: The establishing, coordination and unification of technical standards and procedures for engineering, architectural and city planning projects, and city planning/zoning legislation" (Constitute Project, 2018).
Malaysia	5.71659e+09	0.697425	13 States (The World Factbook, 2018)	149 Municipalities	-	1 = National 2 = States 3 = Municipalities	Yes "For the election of members to the Legislative Assembly of a State the State shall be divided into as many constituencies as there are elected members, so that one member shall be elected for each constituency; and the division shall be made in accordance with the provisions contained in the Thirteenth Schedule" (Constitute Project, 2018).	Yes "Tax bases are set by central authorities, and sub-national governments have limited authority for setting rates. State taxes include export duties on timber (Sabah), excise duties (Sarawak), a land tax, taxes on mines, an entertainment tax, an excise duty on liquor, etc" (OECD, 2016).	Yes "Where any law or executive action relating to any of the matters enumerated in the Concurrent List involves expenditure, such action shall be taken under this Constitution as will ensure that, unless otherwise agreed, the burden of that expenditure is bornea. by the Federation, if the expenditure results either from federal commitments or from State commitments undertaken in accordance with …	No "The Force [Royal Malaysia Police] shall be under the command of an Inspector General who shall be a police officer and shall be responsible to the Minister for the control and direction of the Force and all other persons appointed or engaged for police duties, and who shall have all the powers conferred on a Commissioner or a Chief Police Officer" (Policing Law, 2012). "Proceeding agencies: R…	No "subordinate courts: Court of Appeal; High Court; Sessions Court; Magistrates' Court" (The World Factbook, 2018).	Yes "In accordance with the Federal Constitution of Malaysia, all Malaysian states have jurisdiction over their lands, forests, fishery, agriculture, and water resources, including the power to decide on the administration, management, use and allocation of their forest resources" (Forest Legality, 2013).	Yes In accordance with the Federal Constitution of Malaysia, all Malaysian states have jurisdiction over their lands, forests, fishery, agriculture, and water resources, including the power to decide on the administration, management, use and allocation of their forest resources" (Forest Legality, 2013). "STATE LIST: Except with respect to the Federal Territories of Kuala Lumpur, Labuan and Putra…	Yes "STATE LIST: Except with respect to the Federal Territories of Kuala Lumpur, Labuan and Putrajaya, land including: Permits and licences for prospecting for mines; mining leases and certificates" (Constitute Project, 2018).	Yes " In accordance with the Federal Constitution of Malaysia, all Malaysian states have jurisdiction over their lands, forests, fishery, agriculture, and water resources, including the power to decide on the administration, management, use and allocation of their forest resources" (Forest Legality, 2013).	Yes "STATE LIST: State works and water, that is to say: Roads, bridges and ferries other than those in the Federal List, regulation of weight and speed of vehicles on such roads. FEDERAL LIST: Communications and transport, including - Roads, bridges, ferries and other means of communication if declared to be federal by or under federal law" (Constitute Project, 2018).	Yes "MANG_AUTH/MANG_PLAN: Not reported" (World Database on Protected Areas, UN Environment, 2017) "PA Managing Authorities: Dept. of Wildlife and National Parks, Forestry Department Peninsular Malaysia, state Forestry Departments (Peninsular Malaysia)..." (Abidin and Suksuwan, 2013). "Malaysia’s various Forestry Departments [under the Ministry of Water, Land, and Natural Resources] around the cou…	Yes "In this article “native” means-in relation to Sarawak, a person who is a citizen and either belongs to one of the races specified in Clause (7) as indigenous to the State or is of mixed blood deriving exclusively from those races; and in relation to Sabah, a person who is a citizen, is the child or grandchild of a person of a race indigenous to Sabah, and was born (whether on or after Malays…	Yes "Following the framework of national physical development, the policies and plans are subsequently interpreted into State Structure Plan which is accompanied by specific maps and illustrations. These plans provide policies on development and use of land in a state" (MLIT, 2017).	Yes "Concurrent List: Town and country planning, except in the federal capital" (Constitute Project, 2018). "Level 2: Regional/State Planning. State/Regional Development Plan - State Governments and Economic Corridor Authorities" (MLIT, 2017).
Zambia	5.39865e+09	0.72048	10 Provinces (The World Factbook, 2018)	74 Districts (Humanitarian Data Exchange	-	1 = National 2 = Province 3 = District	No "The President shall appoint a Provincial Minister for each Province from among Members of Parliament" (Constitute Project, 2018).	Yes "Exclusive national functions: Taxation including customs and excise. Concurrent national and provincial functions: Property transfer tax" (Constitute Project, 2018).	Yes "The following shall be prescribed: public participation, at all levels of government, in the formulation of financing frameworks, development plans, and preparation of annual budgets" (Constitute Project, 2018).	No "The police service in Zambia is a national body which falls under the control of the Ministry of the Home Affairs and is structured at a national and provincial level. The Inspector General of Police is responsible for leading the Zambia Police Service (ZPS) in each of Zambia’s ten provinces, each of which is responsible for policing in their respective districts" (APCOF, 2019).	No "subordinate courts: Court of Appeal; High Court; Industrial Relations Court; subordinate courts (3 levels, based on upper limit of money involved); Small Claims Court; local courts (2 grades, based on upper limit of money involved)" (The World Factbook, 2018).	No “For the avoidance of doubt, it is hereby declared that the ownership of all trees standing on and all forest produce derived from the State Lands, Reserves, Trust Lands (Customary Lands), National Forests and Local Forests is vested in the President on behalf of the Republic until lawfully transferred or assigned under this Act or any other written law. While Local Forests have some resource …	Yes "Concurrent national and provincial functions: Nature conservation, provincial spatial planning and development, public transport, agriculture" (Constitute Project, 2018).	No "Exclusive national functions: land, mines, minerals, and natural resources" (Constitute, Project, 2018).	No "The Forestry Department, under the Ministry of Lands and Natural Resources, is the government agency charged with administering and monitoring of forest resources" (Landlinks, 2017).	Yes "Concurrent national and provincial functions: Nature conservation, provincial spatial planning and development, public transport, agriculture" (Constitute Project, 2018).	No [Does not exist in World Database on Protected Areas] "Concurrent national and provincial functions: Nature conservation, provincial spatial planning and development, public transport, agriculture" (Constitute Project, 2018).	No "There is established the Lands Commission which shall have offices in all Provinces and progressively in districts. The Lands Commission shall administer, manage and alienate land, on behalf of the President, as prescribed. Land shall be held, used and managed in accordance with the following principles: recognition of indigenous cultural rites" (Constitute Project, 2018).	Yes "Concurrent national and provincial functions: Nature conservation, provincial spatial planning and development, public transport, agriculture" (Constitute Project, 2018).	Yes "The following shall be prescribed: public participation, at all levels of government, in the formulation of financing frameworks, development plans, and preparation of annual budgets" (Constitute Project, 2018).
Republic of Congo	5.30777e+09	0.743147	12 Departments (The World Factbook, 2018)	94 Municipalities	2753 Villages [no administrative autonomy] "Municipalities and districts are then divided into sub-municipalities and urban sub-districts, 2753 villages, without administrative autonomy" (OECD, 2016).	1 = National 2 = Departments 3 = Municipalities	No "The members of the Senate bear the title of Senator. They are elected by indirect universal suffrage by the departmental and municipal councilors. The Senators represent the local collectivities of the Republic" (Constitute Project, 2018).	No "The Parliament alone votes the law. It consents to the tax, votes the budget of the State and controls its execution. It is referred to [the matter] of the bill of the law of finance at the opening of the session of October" (Constitute Project, 2018).	Yes "The local collectivities of the Republic of the Congo are the department and the commune. [The following] are of the competence of the local collectivities: the budget of the local collectivity. The law determines equally the financial regime of the local collectivities as well as the fundamental principles of the territorial public function" (Constitute Project, 2018).	No "Unlike local governments, security forces, the force publique, are not decentralized entities. They fall under the direct authority of the central government. They are composed of the national police, the gendarmerie and the armed forces" (Zongwe, 2014).	No "subordinate courts: Court of Audit and Budgetary Discipline; courts of appeal; regional and district courts; employment tribunals; juvenile courts" (The World Factbook, 2018).	No "Under the current Republic of the Congo Constitution, natural resources, including forests, are State property" (Forest Legality, 2014).	Yes " The local collectivities of the Republic of the Congo are the department and the commune. [The following] are of the competence of the local collectivities: agriculture, the livestock, fishing and pisciculture" (Constitute Project, 2018).	No "The Parliament alone votes the law. [The following] are of the domain of the law: the approval of the contracts of sharing of production of the liquid or gaseous hydrocarbons or of the other mining resources" (Constitute Project, 2018).	No "Under the current Republic of the Congo Constitution, natural resources, including forests, are State property. However, the State grants logging rights for these lands to private entities" (Forest Legality, 2014)	Yes "The local collectivities of the Republic of the Congo are the department and the commune. [The following] are of the competence of the local collectivities: transports; the road [routier] maintenance" (Constitute Project, 2018).	No "The State sees to the protection and the conservation of the environment. The Parliament alone votes the law...The law equally establishes the rules concerning: the environment and the conservation of the natural resources and of sustainable development" (Constitute Project, 2018).	No "The protection of the rights of indigenous peoples has been constitutionally enshrined since October 2015. Article 16 says that: "The law guarantees and provides promotion and protection of the rights of indigenous peoples." The Ministry of Justice and Human Rights is responsible for promoting indigenous rights" (IWGIA, "Republic of Congo").	Yes " The local collectivities of the Republic of the Congo are the department and the commune. [The following] are of the competence of the local collectivities: the planning, the development and the spatial organization [aménagement] of the department" (Constitute Project, 2018).	Yes " The local collectivities of the Republic of the Congo are the department and the commune. [The following] are of the competence of the local collectivities: the planning, the development and the spatial organization [aménagement] of the department" (Constitute Project, 2018).
Angola	5.27405e+09	0.765669	18 Provinces (The World Factbook, 2018)	162 Municipalities	532 communes (http://documents.worldbank.org/curated/en/811141467999121070/pdf/514080NWP0AO0L10Box342027B01PUBLIC1.pdf)	1 = National 2 = Provinces 3 = Municipalities 4 = Communes	No "Governors of the provinces are appointed by the executive, and municipal administrators are appointed by the governor of the province in which the municipality is located... In May 2015, the Parliament approved a plan for the preparation of local elections that has however been delayed" (OECD, 2016).	No "Provincial and local governments in Angola do not raise any own tax. In practice, they are budget units under a centrally managed budget" (OECD, 2016).	No "Provincial and local governments in Angola do not raise any own tax. In practice, they are budget units under a centrally managed budget" (OECD, 2016).	No "The police force in Angola is a paramilitary body which falls under the control of the Ministry of the Interior, and is structured at both a national and provincial level" (APCOF, 2019).	Yes "subordinate courts: provincial and municipal courts" (The World Factbook, 2018).	No "All land originally belongs to the state and forms part of its private domain, with the aim of conceding and protecting the land rights of individuals or corporate bodies and rural communities, under the terms of the Constitution and the law and without compromise to the provision contained in Point 3 of this Article. Land, which is by origin the property of the state, may be transferred to i…	No "The Ministry of Agriculture, formerly the Ministry of Agriculture and Rural Development, has responsibility for administration of rural land. The 1992 Constitution of the Republic of Angola provides that the government has sovereignty over all territory, water, air space, soil, and subsoil; all natural resources, including land, are the property of the state. Only the state has authority to g…	No "The 1992 Law on Mining and Geological Activities (Law 1/92 of 17 January) provides that all minerals belong to the state. The Council of Ministers must approve of all mining and exploration contracts" (Landlinks, 2010).	No "The 1992 Constitution of the Republic of Angola provides that the government has sovereignty over all territory, water, air space, soil, and subsoil; all natural resources, including land, are the property of the state. Only the state has authority to grant use-rights" (Landlinks, 2010).	No "The Government/MPLA (People's Movement for the Liberation of Angola) is committed to build 1,100 km of roads in addition to 2,834 km of roads built in 2016 and planned rehabilitation of 7,083 km of roads in addition to 10,219 km rehabilitated in 2016. The Government goals will have also the support from the credit line of the R. of China which will benefit inter-municipality links in Luanda, …	No [Does not exist in World Database on Protected Areas] "The Direcção Nacional de Recursos Naturais (National Directorate of Natural Resources) (DNRN) is in charge of protected areas" (Landlinks, 2010).	No "The state shall recognise the status, role and functions of the institutions of the traditional authorities founded in accordance with customary law which do not contradict the Constitution. 2. Recognition of the institutions of the traditional authorities shall oblige public and private entities to respect, in their relations with these institutions, the values and norms of customary law tha…	No "The National Institute of Geography and Cadastre (IGCA) is responsible for creating and maintaining the cadastre, and the National Institute of Spatial Planning and Urban Development (INOTU) is charged with setting planning and development standards. The central government office is responsible for maintaining a central archive of land, demarcation, maps, and records (GOA 2004a; ARD 2007a)" (…	Yes "The provinces are responsible for the promotion and orientation of socio-economic development, provincial planning, social support, education (alphabetisation, primary education), healthcare, environment protection, etc" (OECD, 2016).
Mexico	5.17241e+09	0.787758	32 States and 1 Federal District (The World Factbook, 2018)	2457 Municipalities	-	1 = National 2 = States 3 = Municipalities	Yes "Mexican federalism consists of 32 states with own constitutions and legislatures. Governors and mayors are directly elected by simple plurality" (Gilles, 2014).	Yes "Each state has its own constitution, modeled on the national charter, with the right to legislate and levy taxes other than interstate customs duties" (Tim et al, 1997). "State taxes include the payroll tax (80% of state tax revenue), vehicle tax, gasoline tax, etc" (OECD, 2016).	No "Also, the Senate was excluded from participating in the discussion and approval of the budget. With this limitation, federalism was impaired, for the states were excluded from taking part in the budgetary decision-making process. This limitation continues to the present" (Meyer, 2014).	Yes "Policing responsibilities are divided between federal, state, and municipal governments; the forces are organized both by jurisdiction and by function... In addition, federal and state investigative police serve under the corresponding attorney general’s offices... Federal crimes, such as drug and arms trafficking, fall within the jurisdiction of the federal investigative police" (Meyer, 201…	Yes "subordinate courts: federal level includes circuit, collegiate, and unitary courts; state and district level courts" (The World Factbook, 2018).	No "According to the constitution, all land and water in Mexico belongs to the nation and the national government is in charge of providing legislation to operationalise this principle" (OECD, 2017). "Mexican states have fewer powers related to land use than the national government, which is unusual among federal OECD countries" (OECD, 2017).	No "The National Agrarian Registry (Registro Agrario Nacional – RAN) is the federal agency responsible for recording rights to land under federal control, including ejidal, comunidad, and colonias land. All acts related to the use, disposition and modification of these land rights must be recorded with RAN, which operates through state-level offices. RAN is also responsible for issuing: (1) certi…	No "Regulations to implement the law were promulgated in 2012 and 2014. According to the law, mining activities may be carried out by Mexican private individuals, ejidos, comunidades, municipalities and corporations through concessions granted by the Federal Government" (Landlinks, 2017).	No "To use forest resources for commercial sale or convert forestland to other uses requires authorization from the Secretariat of the Environment and Natural Resources (SERMARNAT). Forest use permits are MEXICO– PROPERTY RIGHTS AND RESOURCE GOVERNANCE PROFILE 26 generally issued for 10 years. As such, the Secretary of Environment and Natural Resources (Secretaria de Medio Ambiente y Recursos Nat…	No "Federal government and state governments can agree transfer among them of some functions, provision of public services or implementation of infrastructure and works, whenever it is necessary for the economic and social development of the country. "The House of Representatives shall have the exclusive power to authorize multiannual expenditures for construction of infrastructure, so subsequent…	Yes "MANG_AUTH: Ministry of Urban Development and Environment of the State of MX-TAM" (World Database on Protected Areas, UN Environment, 2017) "At the state level, the two most important plans mirror those at the national level. State Spatial Development Plans and State Ecological Spatial Plans contain objectives and strategies for the respective topics at the state level and must take the corre…	No "As a part of the 1992 reforms, the GOM [Government of Mexico] instituted a massive land-rights regularization program known as PROCEDE. The goals of this program were to register and title land rights in ejidos [collective holdings] and comunidades [ forms of collective ownership for indigenous groups] to strengthen land tenure security, improve the efficiency of rural land markets (and credi…	Yes "STATE ECOLOGICAL SPATIAL PLANS - PLANES DE ORDENAMIENTO ECOLÓGICO TERRITORIAL (POET) - General guidelines for land use, developed by states or the federal district" (OECD, 2017). "The State shall have a National System of Statistical and Geographical Information, which shall provide official data. All data contained in this system shall be used mandatorily for the Federation, the States, the…	Yes "STATE SPATIAL DEVELOPMENT PLANS - PROGRAMAS ESTATALES DE ORDENAMIENTO TERRITORIAL (PEOT) - Strategic programmes for social, economic, cultural and environmental development at the state level - Include different topics such as territorial planning, urban development, risk management, rural development, economic development, and environmental management" (OECD, 2017).
Myanmar	4.98043e+09	0.809027	7 Regions, 7 States, 1 Union territory (The World Factbook, 2018)	74 Districts (The Asia Foundation, 2018)	-	1 = National 2 = Regions/ States (Equal Status) 3 = Districts "The existing seven Divisions are designated as seven Regions and the existing seven States are designated as seven States. Those seven Regions and seven States are of equal status" (Constitute Project, 2018).	No "The executive branch of the state/region governments is led by a chief minister and a cabinet of state/region ministers. The President of Myanmar plays a crucial role in the selection of the chief minister. In addition to the president’s leading role in the appointment of the chief minister, the State or Region Governments Law (2010) makes clear that the chief minister is responsible to the p…	Yes "The Region or State shall collect the taxes and revenues listed in Schedule Five in accord with law and deposit them in the Region or State fund. The Region or State has the right to expend the Region or State fund in accord with the law. Region or State Legislative List: Municipal taxes such as taxes on buildings and lands, water, street lightings and wheels" (Constitute Project, 2018).	Yes "Region or State Legislative List: THe Region or State budget" (Constitute Project, 2018).	Yes "Structure of Bago Region government(with indicative departments) - Chief Minister - Ministry of Security and Border Affairs - Myanmar Police Force [Dual, but limited, accountability to state/region government" (The Asia Foundation, 2018).	Yes "subordinate courts: High Courts of the Region; High Courts of the State; Court of the Self-Administered Division; Court of the Self-Administered Zone; district and township courts; special courts (for juvenile, municipal, and traffic offenses); courts martial" (The World Factbook, 2018).	No "The state is the ultimate owner of all land in Burma" (Landlinks, 2017).	No "With the enactment of the Farmland Law (2012), those seeking rights to farmland must obtain permission and a land-use certificate (LUC) from the state [central]. Following passage of the 2012 Farmland Law and the Vacant, Fallow and Virgin Lands Management Law (VFV Law) the DALMS is responsible for recording and registering interests in farmland and for issuing LUCs to farmers whose use rights…	No "The MoNREC [Ministry of Natural Resources and Environmental Conservation] is responsible for implementing the Union of Burma’s mineral policy and for enforcing the laws, rules and regulations related to mining. It evaluates and processes all license applications related to prospecting, extracting and processing of minerals" (Landlinks, 2017).	No "The Ministry of Forestry promulgated the Forest Rules in 1995 with the intention of implementing the provisions of the Forest Law. The Forest Rules deal with: reserved forest (forest areas reserved for the state and off-limits to development); the declaration of areas as protected public forest; the management of forest land; the establishment of forest plantations; and the procedures for obt…	Yes "Region or State Legislative List: Roads and bridges having the right to be managed by the Region or State" (Constitute Project, 2018). "State and region responsibilities under Schedule 2: Transport, Communication, and Construction Sector; Roads, bridges, and ports. Private vehicles, water resources and waterways" (The Asia Foundation, 2018).	No [Does not exist in World Database on Protected Areas] "The Ministry of Forestry promulgated the Forest Rules in 1995 with the intention of implementing the provisions of the Forest Law. The Forest Rules deal with: reserved forest (forest areas reserved for the state and off-limits to development); the declaration of areas as protected public forest; themanagement of forest land; the establishm…	No "Ministry of Ethnic Affairs: With making an ambitious effort into ethnic unity in democratization era, The Union Parliament enacted the Ethnic Rights Protection Law, and the new government that was formed on 30 March 2016 established Ministry of Ethnic Affairs for the Republic of the Union of Myanmar as well. The Ministry of Ethnic Affairs was organized in accordance with the agreement of the …	No "Provisions of this old act no longer match the situation nowadays that Ministry of Construction, having jurisdiction over this act, proceeds drafting of the replacing act, which is the National Spatial Development Planning Act. The contents of the newly drafted act, as of December 2012, includes: spatial planning policy for three spatial levels (national, regional (region/state) and township)…	Yes "Region or State Legislative List: Development matters" (Constitute Project, 2018) "State and region responsibilities under Schedule 2: Management Sector; Development matters (municipal and urban services); Town and housing development, border area and rural development" (The Asia Foundation, 2018).
Central African Republic	4.13546e+09	0.826687	16 Prefectures/ Provinces (The World Factbook, 2018) "Though the northeast is considered the most critical failure of state inclusion, threadbare state institutions remain weak across all of the country’s 16 prefectures" (The World Bank, 2018).	66 sub-prefectures (UNDP, 2018)	175 Municipalities (UNDP, 2018)	1= National 2 = Prefectures/Provinces [local government] 3 = Sub-prefectures [local government] 4 = Municipalities [local government] "Central Africa’s decentralized systems of government have two different levels of local government: regional and local. They also have two different versions of local government: decentralized and deconcentrated subnational units. The types of structure include pr…	No "[Priority Pillar 2: Renew the social contract between the state and the population] A decentralization policy, including local elections for the establishment of local authorities, will be implemented, as well as a local reconciliation and social cohesion policy" (The World Bank, 2018)* "Limited polical decentralization; indirect election of mayors" (UNDP, 2018). "Currently, the state’s legal…	Yes "Local governments can raise taxes; Local governments can set tax rates- Central African Republic- Yes" (UNDP, 2018).	No "Local authorities endowed with autonomy to prepare and execute their own budgets- Central African Republic- No" (UNDP, 2018).	No "Law enforcement in the Central African Republic is primarily conducted by the National Police (Sûreté Nationale) and the Gendarmerie" (The Law on Police Use of Force, 2019). "The national police, under the authority of the Ministry of the Interior in Charge of Public Safety, has a history of institutional weakness and poor training. The police force consists of about 1,350 officers for the en…	No "subordinate courts: high courts; magistrates' courts" (The World Facbook, 2018).	No "The current CAR Forest Code (Code Forestier de la République Centrafricaine) was adopted in October 2008. The Forest Code provides for state ownership [central] of the country’s forests and divides the forests into the permanent forest domain and non-permanent forest domain" (Landlinks, 2010). "The Forest Code is consistent with other CAR land legislation, stating that all forests are state-o…	No "The state [central] can grant concessions of land in its private domain to individuals and entities as concessions. The concessionaire must develop the land in accordance with the terms of the concession within two years for urban land and within five years for rural land" (Landlinks, 2010).	No "Article 6 of the Mining Code provides that all mineral resources are the property of the state. The 2009 Mining Code regulates the mining sector through a system of permits and licenses. The rights granted are categorized as either industrial or artisanal. Individuals and entities can obtain one-year, renewable prospecting permits. Exploration permits are available for three years for areas u…	No " The state has the authority to grant forest exploitation and development permits for unlimited time periods" (Landlinks, 2010). "The Forest Code is consistent with other CAR land legislation, stating that all forests are state-owned. It provides the authority for the licensing of traditional timber production and community forests. This provides that timber extracted from community forests o…	No "[Priority Pillar 3: Promote economic recovery and boost productive sectors] Repair and construct infrastructure: transport, electricity, and communication networks - Roads and transport" (The World Bank, 2018)* *PREREQUISITE INFORMATION BELOW ------------------------------------------------------------------------------------------------------------------------------------------ Framework Pro…	No [Does not exist in World Database on Protected Areas] "[Priority Pillar 3: Promote economic recovery and boost productive sectors] An integrated, participatory, and sustainable approach to land use planning for forest savannas and dry forests, and a protected areas management plan, will be developed with the objective of promoting shared growth and sustainable natural resource exploitation of …	No "Outside of urban areas, the government owns all land, although customary rights to usage are common" (Bertelsmann Stiftung, 2018). "The Forest Code assigns local villages and/or indigenous communities a decision-making role in the granting of exploitation permits and requires the entities receiving exploitation and development permits to contribute to the social well-being of the local commun…	No "[Priority Pillar 3: Promote economic recovery and boost productive sectors] An integrated, participatory, and sustainable approach to land use planning for forest savannas and dry forests, and a protected areas management plan, will be developed with the objective of promoting shared growth and sustainable natural resource exploitation of fauna and related products" (The World Bank, 2018)* *P…	No " [Priority Pillar 2: Renew the social contract between the state and the population] Representative and accountable political governance will be promoted through the creation and strengthening of democratic institutions (including the National Assembly) in line with the CAR constitution as well as through supporting national planning processes" (The World Bank, 2018)* *PREREQUISITE INFORMATIO…
Vietnam	3.56963e+09	0.841931	58 Provinces and 5 Municipalities "58 provinces (tinh, singular and plural) and 5 municipalities (thanh pho, singular and plural)" (The World Factbook, 2018).	710 Districts	11, 145 Communals	1 = National 2 = local provincial 3 = local district 4 = local communal	No "A representative of the National Assembly and a representative of a People's Council [tier-2 government] shall be removed from office by the electors or the National Assembly or the People's Council, when he or she is no longer worthy of the confidence of the people" (Constitute Project, 2019).	Yes "Local governments have three main sources of revenue: 1) land-related taxes and fees and local fees and charges, 100% of which can be retained by the local authorities; 2) revenue sharing between local authorities and central government (e.g. sourced from VAT, except on imports), corporate and personal income tax, and excise tax on domestic goods etc" (p.15, Trung et al (2015)).	Yes "The PPCI's [Provincial People's Council] key mandates and powers are to approve the provincial master plans (land use, forest protection, socioeconomic development, etc), five-year plans and annual plans (land use, forest development and protection, and socioeconomic development; annual budget plan" (p.11, Trung et al (2015)).	No "1. The official hierarchy: a) The Ministry of Public Security b) Public Security Departments of municipalities and provinces c) Public Security Offices of rural districts, urban districts, cities and provincial capital cities d) Public Security Posts of communes, wards and towns" (Ministry of Public Security, 2018).	Yes "subordinate courts: High Courts (administrative, civil, criminal, economic, labor, family, juvenile); provincial courts; district courts; Military Court; note - the National Assembly Standing Committee can establish special tribunals upon the recommendation of the chief justice" (The World Factbook, 2018).	No "As with other land in Vietnam, no forests are subject to private ownership, but rather belong to the people and are managed by the state [central government]. However, private entities, including households, may be allocated or lease forestland for 50 years" (Landlinks, 2016). "The DARD is responsible for agriculture and rural development, including forests, at the provincial level. It is dir…	No "The law authorizes the state to allocate land to certain entities for particular kinds of use. These include: (1) households and individuals working directly in agriculture, forestry, aquaculture or salt production; (2) agricultural cooperatives using land for direct service production in agriculture and forestry; and (3) communities using agricultural land" (Landlinks, 2016). "The DARD is re…	No "Under the new Mineral Law and its corresponding regulations, the state [national government] administers Vietnam’s mineral resources by regulating geological surveys, mineral exploitation, mining and overall management of the nation’s unexploited minerals. The Mineral Law does not cover oil and natural gas operations. These fall under the Petroleum Law of 1993 (amended in 2008), which vests i…	Yes "The PPC has the following range of mandates and powers relating to land and forest management: To give permission for natural timber exploitation plans submitted by companies and forest management boards" (p.12, Trung et al (2015)).	Yes "Since the initiation of renovation in 1986, the local governments have been given decision-making powers on the preparation and implementation of various master plans and annual plans; the management of land and natural resources; other actions such as infrastructure construction" (p.8, Trung et al (2015)).	Yes "MANG_AUTH/MANG_PLAN: Not reported" (World Database on Protected Areas, UN Environment, 2017) "According to the Biodiversity Law, the governments at every level have the power and duty to establish and manage special-use forests. However institutional arrangements are different among protected areas. MARD and its provincial departments are responsible for managing six natural conservation are…	No "The Nationalities Council studies and makes proposals to the National Assembly on issues concerning the nationalities; supervises and controls the implementation of policies on nationalities, the execution of programmes and plans for socio-economic development of the highlands and regions inhabited by national minorities" (Constitute Project, 2018). "Although Vietnamese law now permits commun…	Yes "The PPC [Provincial People's Commitee] has the following range of mandates and powers related to land and forest management: ...To implement work on mapping, investigating land-use status, establishing provincial land and forest resource databases and solving land and forest management disputes. The PPCI's [Provincial People's Council] key mandates and powers are to approve the provincial ma…	Yes "The PPCI's [Provincial People's Council] key mandates and powers are to approve the provincial master plans (land use, forest protection, socioeconomic development, etc), five-year plans and annual plans (land use, forest development and protection, and socioeconomic development; annual budget plan" (p.11, Trung et al (2015)).
Thailand	3.40625e+09	0.856477	76 Provinces (The World Factbook, 2018)	209 Municipalities	2,232 Sub-district Municipalities	1 = National 2 = Province 3 = Municipalities 4 = Sub-District Municipalities	No "There are 76 provinces in Thailand (including Bangkok). Central government provincial offices (except Bangkok) are under the central government. Each is headed by a Provincial Governor appointment by the Ministry of Interior (except Bangkok in which its Governor is elected)" (Spain, 1983).	Yes "Local governments in Thailand can perceive both shared and own taxes. Subnational authorities can get a share of 1/9th of the VAT colleced in its province ; an additional 10% collected by the State on the specific business tax ; an additional 10% collected on excise and alcohol tax; full amount collected on real estate registration ; as well as a part of mineral and petroleum tax. Along with…	Yes "The Provincial Council would have legislative authority on provincial functions and providing oversight on the provincial executive headed by the governor. The provincial governor would prepare the provincial budget for approval by the Provincial Council. All legislation approved by the Provincial Council would have the force of the law unless overturned by an act of national parliament or b…	No "The Royal Thai Police is the primary law enforcement agency in Thailand, although the military continue to carry out law enforcement tasks" (Law on police use of force in Thailand, 2019). "The Royal Thai Police has published in the Royal Gazette an announcement regarding the structure and jurisdiction of the new Police Royal Guards 904 Division. The Police Royal Guards 904 Division is headed …	No "subordinate courts: courts of first instance and appeals courts within both the judicial and administrative systems; military courts" (The World Factbook).	No "The state owns all forests in Thailand" (Landlinks, 2011).	No "The Department of Lands (within the Ministry of the Interior) is responsible for land administration in Thailand and operates through a system of provincial and district land offices. The Department is responsible for registering landholdings, issuing land titles and land-use certificates, and conducting cadastral surveys" (Landlinks, 2011).	No "The Minerals Act of 1967 (as amended), governs the exploration, exploitation, and trade in minerals other than petroleum. The Department of Primary Industry and Mines (within the Ministry of Industry) and the Department of Minerals (in the Ministry of Natural Resources and the Environment) are responsible for administering the Minerals Act" (Landlinks, 2011).	No "Concession licenses: The Forest Act B.E. 2484 (1941), Section 63 specifies that the government has the power to grant logging concession in a forest. Legal authority: The Royal FOrest Department, the Ministry of Natural Resources and Environment; The Department of Marine and Coastal Resources, the Ministry of Natural Resources and Environment" (Nepcon, 2017). "Under the Forestry Act, there ar…	Yes "According to this text first level governments and Pattaya are responsible for a number functions including city planning ; transportation ; social welfare service and protection of the vulnerable ; maintenance of public infrastructures (markets, transportation means, ports) and public spaces ; education ; environment protection and natural resources management ; public security" (OECD, 2016…	No [Does not exist in World Database on Protected Areas] "As the pressure to grant farmers title to forestland increased, the Forest Department attempted to consolidate its authority by classifying more forest as protected areas or tree plantations. The Forest Department‘s effort to expand its control has the potential to further marginalize those communities that have depended on community right…	No "While the Constitution states that traditional and local communities have the right to participate in natural resources management, the details on how this shared management relationship would work and what resources local communities have the right to manage are still under debate. There is no special policy in Thailand distinguishing the rights of indigenous peoples, who live largely in the…	No "On 9 July 2002, the Cabinet mandated the Department of Public Works and Town & Country Planning (DPT) to accelerate development of the urban plan to cover all areas throughout the country. Spatial development policies, including region-specific programs, have traditionally been included in this document, but in recent years the policy statements on spatial development have grown weaker, and a…	Yes "At present, as a result of this provision in the constitution, every province has to prepare its provicial development strategic plan along with the budget proposal. The plan and budget are then directly submitted to the National Budget Bureau" (Chardchawarn, 2010).
Cameroon	3.35997e+09	0.870826	10 Regions "The following provinces shall become Regions: • Adamaoua; • Centre; • East; • Far North; • Littoral; • North; • North West; • West; • South; • South West" (Constitute Project, 2019).	58 Departments	360 Communes	1 = National 2 = Regions [local government] 3 = Departments [local government] 4 = Communes [local government] "Central Africa’s decentralized systems of government have two different levels of local government: regional and local. They also have two different versions of local government: decentralized and deconcentrated subnational units. The types of structure include provinces, regions, distr…	No "The Cameroon governance system is highly centralized. Under the president and national government, the country comprises 10 semiautonomous regions. Each is headed by a presidentially appointed governor, with broad powers" (Wily, 2011).	Yes "Local governments can raise taxes; Local governments can set tax rates- Cameroon- Yes" (UNDP, 2018).	Yes "Local authorities endowed with autonomy to prepare and execute their own budgets- Cameroon- Yes" (UNDP, 2018).	No "The national police service in Cameroon is called the Délégation générale à la Sûreté nationale, which translates to General Delegation for National Security in English. The primary objective of the General Delegation for National Security is to ensure the protection and respect of institutions in Cameroon, public freedoms of persons, and property. In terms of structure, the General Delegatio…	No "subordinate courts: Parliamentary Court of Justice (jurisdiction limited to cases involving the president and prime minister); appellate and first instance courts; circuit and magistrates' courts" (The World Factbook, 2018).	No "Cameroon’s formal law classifies land as private, public or national. Private land can be owned by individuals and corporate entities, groups or the state. In order to be deemed private, the land must be titled and registered. Public land (e.g., highways, parks, waterways) is land held by the state for the benefit of the people of Cameroon. All other land is classified as national land, which…	No "The Ministry of Property and Land Affairs (Ministere des Domaines et des Affaires Foncieres, MINDAF), which is also referred to as the Ministry of State Property and Land Tenure, is the primary public actor in the land sector. MINDAF has authority over all land, but many of its objectives are largely focused on state land. MINDAF has overall responsibility for land allocations, land developme…	No "Mining exploration and exploitation shall be conducted under state authorization, which is provided by permit or license" (Landlinks, 2011). "Licensing. Identify the main fiscal/legal model granting rights to explore and produce oil and gas. Legal Contractors are granted rights to explore, develop and produce oil and gas by obtaining both an authorisation from the State [central government] a…	No "Before a concession can be granted, a public call for tenders must occur. An interministerial committee pre-selects bidders according to technical, financial, and professional criteria. The winner has to pay a fee to the Public Treasury before the Minister then signs a provisional exploitation contract with the winner. The provisional exploitation contract has a maximum duration of three year…	Yes "Main responsibilities sectors and subsectors - Regions - Economic affairs/transports; Support to inter-urban transportation and road maintenance" (SNGWOFI, 2019).	No "GOV_TYPE: Not reported; Federal/National Ministry or Agency [MANG_AUTH = Not reported; State; State/WWF; State/WCS; State/Cameroon Wildlife Aid Fund] " (World Database on Protected Areas, UN Environment, 2017) "The state [central government] is responsible for the protection of the country’s forests and sets a standard of maintaining at least 30% of total land area as protected, permanent for…	No "In Cameroon, customary land ‘law’ refers to the (usually unwritten) rules and procedures through which a rural community regulates land relations among its members, and with neighbouring or associated communities. The constitution does not mention customary land interests. It does pledge to protect the rights of indigenous populations but does so only in the preamble... Moreover, the context …	No "The ministry’s [Ministry of Property and Land Affairs] structure provides for provincial [regional] and prefect-level (i.e., division-level) offices that were intended to have primary responsibility for many land matters, including land allocations and land use planning. However, the decentralization of many functions has not been supported by the legal framework and the authority of the vari…	Yes "Main responsibilities sectors and subsectors -Regions - Regional planning; Support to urban planning including housing" (SNGWOFI, 2019).
Philippines	3.08376e+09	0.883995	81 Provinces	1489 Municipalities 105 Cities	42028 Villages	1 = National 2 = Provinces 3 = Municipalities/cities 4 = Villages	Yes "Cities that are highly urbanized, as determined by law, and component cities whose charters prohibit their voters from voting for provincial elective officials, shall be independent of the province. The voters of component cities within a province, whose charters contain no such prohibition, shall not be deprived of their right to vote for elective provincial officials" (Constitute Project, …	Yes "Provinces and cities have to share some of their revenues with the municipalities and barangays and are restricted on the set of taxes they can collect" (OECD, 2016). "Scope of Taxing Powers. - Except as otherwise provided in this Code, the province may levy only the taxes, fees, and charges as provided in this Article" (Chan Robles Virtual Law Library, 2019).	Yes "Local Finance Committee. - There is hereby created in every province, city, or municipality a local finance committee to be composed of the local planning and development officer, the local budget officer, and the local treasurer. It shall exercise the following functions: (c) Recommend to the local chief executive concerned the level of the annual expenditures and the ceilings of spending f…	No "Organization. – The PNP [Philippine National Police] shall be headed by a Chief who shall be assisted by two (2) deputy chief, one (1) for operations and one (1) for administration, both of whom shall be appointed by the President upon recommendation of the Commission from among the most senior and qualified officers in the service. At the provincial level, there shall be a PNP office, each h…	No "subordinate courts: Court of Appeals; Sandiganbayan (special court for corruption cases of government officials); Court of Tax Appeals; regional, metropolitan, and municipal trial courts; sharia courts" (The World Factbook, 2018).	No "Under the 1987 Constitution all forest lands and natural resources belong to the State" (Landlinks, 2017).	No "Land rights are acquired from the State by public grant or by operation of law, or from private transactions or contracts involving private lands. Public grants include: 1) land patents (homestead, sales or free patents) or leases conferred under special laws; 2) royal grants/decrees issued during the colonial period; 3) titles acquired under agrarian reform laws. The Department of Agrarian R…	No "The Mines and Geosciences Bureau of the Department of Environment and Natural Resources (DENR) is responsible for implementing mining laws, including the granting of licenses, permits and concessions" (Landinks, 2017).	No "Resource utilization [e.g., waters, fisheries and forests] is subject to State concession or licensing" (Landlinks, 2017).	Yes "For a province: Infrastructure facilities intended to service the needs of the residents of the province and which are funded out of provincial funds including, but not limited to, provincial roads and bridges; inter-municipal waterworks, drainage and sewerage, flood control, and irrigation systems; reclamation projects; and similar facilities" (Chan Robles Virtual Law Library, 2019).	Yes "GOV_TYPE = Subnational ministry or agency [MANG_AUTH = Provincial Local Government United, Municipal Local Government Unit " (World Database on Protected Areas, UN Environment, 2017) "The Department of Environment and Natural Resources (DENR) is responsible for the management, development and conservation of forest and grazing lands. Terrestrial protected areas cover almost 11 percent of the…	No "The 1997 Indigenous Peoples’ Rights Act recognizes the right of indigenous peoples to their cultural integrity and self-government, and their customary property rights to ancestral domains and lands. ...the National Commission on Indigenous Peoples (NCIP), which assists indigenous peoples in securing title to their lands and approves any proposed disposal, utilization, management or appropria…	Yes "Province - Provincial Development and Physical Framework Plan" (MLIT, 2017).	Yes "The appointment of a planning and development coordinator shall be mandatory for provincial, city and municipal governments. Officials of the Provincial Government. - (a) There shall be in each province a governor, avice-governor, members of the sangguniang panlalawigan, a secretary to the sangguniang panlalawigan, a provincial treasurer, a provincial assessor, a provincial accountant, a pro…
India	3.00928e+09	0.896846	29 States and 7 Union Territories (The World Factbook, 2018)	250,671 Municipalities, 630 Zilla Panchayats 6614 Block Panchayats 253163 Gram Panchayats "As per January 2019, there are 630 Zilla Panchayats; 6614 Block Panchayats and 253163 Gram Panchayats in India" (Pria, 2018).	-	1 = National 2 = States and Union Territories 3 = Municipalities/ Panchayats	Yes "State governments in India are elected. The Government is led by the Chief Minister. All states in India have a state legislative assembly. Some states also have a legislative council that is indirectly elected (much like the Rajya Sabha at the national level)" (Personal Communications, Rohini Chaturvedi). "There shall be a Governor for each State. The Governor of a State shall be appointed …	Yes "States can raise their own taxes but they are also heavily dependent on the formula-based, divisible tax pool shared by the Government of India, based on the recommendations of the Finance Commissions" (Personal Communications, Rohini Chaturvedi). "State governments perceive shared taxes and own sources subnational taxes... More than two thirds of the revenues of State governments come from …	Yes "As in the case of the Government of India, the State Legislative Assemblies approve of an annual budget for the state" (Personal Communications, Rohini Chaturvedi).	Yes "Under the Constitution, police is a subject governed by states. Therefore, each of the 29 states have their own police forces. The centre is also allowed to maintain its own police forces to assist the states with ensuring law and order. Therefore, it maintains seven central police forces and some other police organisations for specialised tasks such as intelligence gathering, investigation,…	Yes "There shall be a High Court for each State...Every High Court shall be a court of record and shall have all the powers of such a court including the power to punish for contempt of itself" (Constitute Project, 2019). "subordinate courts: High Courts; District Courts; Labour Court" (The World Factbook, 2018).	Yes "According to the Indian Constitution, ownership of government land, including forest land rests with the States. However, as already discussed, powers for decision-making on forest land use are vested in the national government. Although the Government of India exercises considerable power in defining the policy contours of forest conservation, it has little control over the infrastructure a…	Yes "State List: Agriculture, including agricultural education and research, protection against pests and prevention of plant diseases" (Constitute Project, 2019). "Under the Land Registration Act (1908), land registration is controlled in each state by an official with the title of Inspector General-Revenue. In each district, an appointed Registrar presides over the District Registrar‘s office. …	Yes "The state governments own minerals located within their borders and are largely responsible for granting concessions for mineral exploration within their boundaries. Minerals located offshore are the property of the GOI. The GOI and state governments own and manage all minerals other than natural gas and petroleum pursuant to the Mines and Minerals (Regulation and Development) Act (1957). Na…	Yes "The concession rights of the private owned companies in the government owned forest lands has been discontinued, following FCA 1980 & supreme court orders on Godavarman vs Union of India case" (http://www.timbertradeportal.com/countries/india/#legality-profile) "Within the constraints of national legislation, forests are managed in each state by a Forest Department. Each state Forest Departm…	Yes "State List: Communications, that is to say, roads, bridges, ferries, and other means of communication not specified in List I; municipal tramways; ropeways; inland waterways and traffic thereon subject to the provisions of List I and List III with regard to such waterways; vehicles other than mechanically propelled vehicles. The Legislature of a State may, by law, make provision with respect…	Yes "GOV_TYPE = Subnational ministry or agency [MANG_AUTH = Chief Wildlife Warden, State Forest Department " (World Database on Protected Areas, UN Environment, 2017) "“State Government”, in relation to a Union Territory, means the Administrator of that Union Territory appointed by the President under Art 239 of the Constitutions... “reserve forest” means the forest declared to be reserved by the…	Yes "Tribes that the GOI officially recognizes are referred to as Scheduled Tribes and commonly referred to as ST communities. The Forest Rights Act of 2006 transferred substantial authority over forestry management to local ST communities. However, most states have not yet effectively implemented the law to this end. The GOI enacted the Scheduled Tribes and Other Traditional Forest Dwellers (Rec…	Yes "The Legislature of a State may, by law, make provision with respect to- the composition of the District Planning Committees; the functions relating to district planning which may be assigned to such Committees; Every District Planning Committee shall, in preparing the draft development plan, have regard to matters of common interest between the Panchayats and the Municipalities including spa…	Yes "On the state government level, urban planning and development administration are administered by the State Town Planning Act and the relevant legal framework of each state. Presently, all states have ministries responsible for urban planning, urban development, housing and governance" (MLIT, 2017). "The Legislature of a State may, by law, make provision with respect to- the composition of th…
Cambodia	2.964e+09	0.909503	24 Provinces, 1 municipality "24 provinces (khett, singular and plural) and 1 municipality (krong, singular and plural)" (The World Factbook, 2018).	159 Districts, 26 Municipalities, 12 khans "Currently, the kingdom consists of a capital city, 24 provinces, 159 districts, 26 municipalities and 12 khans, 1406 communes and 227 sangkats" (Administration, Open Development Cambodia, 2015).	1406 Communes, 227 Sangkats "Currently, the kingdom consists of a capital city, 24 provinces, 159 districts, 26 municipalities and 12 khans, 1406 communes and 227 sangkats" (Administration, Open Development Cambodia, 2015).	1 = Central 2 = Provices 3 = District/Municipality/Khan 4 = Sangat/Commune	No "All defined subnational administrations [Capital, provinces, municipalities, districts and khans] are legal entities and have a legally elected council. Councils, indirectly elected by the commune councilors for 5 years, are central to the effective implementation of deconcentration and decentralization reforms. Each council has a chair, appointed based on the highest number of votes, and is …	Yes "The provinces and municipalities have modest powers to levy taxes....Councils have rights to certain types of tax and nontax revenues (including revenue sharing) and national transfers, details of which are to be established under a subnational administration finance law" (Niaz, 2011).	Yes "Councils may make legislative decisions—by-laws—on the following: new functions, obligatory functions, permissive functions, 3-year investment programs, 5-year unified area development plans, annual budgets and medium-term expenditure frameworks, public financial management (PFM) systems, structures and committees of council, asset management, citizen consultation, and other duties prescribe…	No "There is intense preoccupation with the notion of the unitary state and the importance of centralized government control focused on security issues—including control of the police, military, and security forces—through administrative arrangements in the provinces and districts. Although recent reforms give increasing attention to regional economic development and service delivery, the desire …	Yes "subordinate courts: Appellate Court; provincial and municipal courts; Military Court" (The World Factbook, 2018).	No "State property [central government] comprises land, underground mineral resources, mountains, sea, undersea, continental shelf, coastline, airspace, islands, rivers, canals, streams, lakes, forests, natural resources, economic and cultural centers, bases for national defense and other buildings determined as State property" (Constitute Project, 2019).	No "An economic land concession (ELC) is a long-term lease that allows a concessionaire to clear land in order to develop industrial-scale agriculture, and can be granted for various activities including large-scale plantations, raising animals and building factories to process agricultural products" (Concessions, Open Development Cambodia, 2015). "ELCs [economic land concessions] were limited to…	No "A mining company wishing to operate in Cambodia must apply to the Council for Development of Cambodia (CDC) [central government] for a mining concession. The CDC grants exploration licenses to investors" (Landlinks, 2011).	No " Any individual, legal entity or community that intends to harvest forest products for commercial purposes must possess a harvest permit issued by the Forestry Administration. Under the Forestry Law, usufruct rights to forest resources can be conveyed by the state to designated beneficiaries by means of forest concessions (limited usufruct rights) and community forest designations (limited us…	No "The report was developed primarily through consultations with the Ministry of Public Works and Transport (MPWT), which manages the national and provincial road networks and the railways; the Ministry of Rural Development (MRD), which manages rural roads; and development partners working in the transport sector" (Asian Development Bank, 2011).	No "GOV_TYPE: Not reported; Federal/National Ministry or Agency [MANG_AUTH = Not reported; Ministry of Environment; Ministry of Agriculture Forestry and Fisheries / Forest Administration; Authority for the Protection and Management of Angkor and the Region of Siem Reap] " (World Database on Protected Areas, UN Environment, 2017) "The Ministry of Environment manages forests in protected areas, and…	No "As mentioned, the 2001 Land Law recognizes Indigenous Communities and their right to claim a communal land title (CLT) over their customary lands, albeit with some significant exclusions as explained below... Despite the legal recognition of indigenous communities’ collective land rights, the process of obtaining CLTs is complicated and slow, and implementation has been weak. Many indigenous …	No "The Ministry of Land Management, Urban Planning and Construction (MLMUPC) is the government agency with primary responsibility for land management, including: policy and coordination of land registration and administration; land use planning; geodetic and cadastral surveying, mapping; and property valuation. The Ministry is represented at the provincial level by the Department of Land Managem…	Yes "Councils may make legislative decisions—by-laws—on the following: new functions, obligatory functions, permissive functions, 3-year investment programs, 5-year unified area development plans, annual budgets and medium-term expenditure frameworks, public financial management (PFM) systems, structures and committees of council, asset management, citizen consultation, and other duties prescribe…
Tanzania	2.83153e+09	0.921595	31 Regions (The World Factbook, 2018).	169 Districts "According to the 2012 Tanzania National Census, Tanzania was divided into 169 districts" (National Bureau of Statistics, 2012).	-	1 = National 2 = Regional Administration (Local government) 3 = District Councils (Local government) 4 = Township Level/division 5 = Ward 6 = Village "Tanzania has a two-tier system of government, consisting of the central government and local government (regional administrations and district councils" (p. 15, Mbwambo, (2015))	Yes "Local authorities are composed of 118 rural councils and 42 urban councils... All councilors are democratically elected; council elections are held every five years" (OECD, 2016). "Article 146 further states that one of the objectives of local governments is to consolidate democracy in their areas of jurisdiction and to apply it to accelerate the development of the people. [President] Electe…	Yes "Apart from the national budget allocations, local governments can raise funds from different sources, including fees (e.g. on forest products), licenses, property taxes and rents, charges and fines. The central government continues to exercise excessive control over local governments, such as approving their revenue sources, budgets and by-laws" (p. 15, Mbwambo (2015)).	Yes "The central government continues to exercise excessive control over local governments, such as approving their revenue sources, budgets and by-laws" (p. 15, Mbwambo (2015)).	No "Oversight of the police is conducted both internally and externally, with internal disciplinary procedures conducted by way of tribunals and other measures by the Principal Secretary of the Ministry of Police and the Inspector-General of Police" (APCOF, 2019).	No "subordinate courts: Resident Magistrates Courts; Kadhi courts (for Islamic family matters); district and primary courts" (The World Factbook, 2018).	No "The Land Act of 1999 and the Village Land Act of 1999 vest ownership of the land in the President as trustee, meaning that ultimately the Tanzanian government is the owner of all land" (p. 33, Mbwambo, (2015)).	No " [National] Authority to keep the land registry and administer and issue land title certificates [for titling of agricultural lands" (p. 32, Mbwambo, (2015)).	No " [Ministry or Energy and Minerals] Authority to issue mining license. [Ministry of Natural Resources and Tourism] Authority to issue special permits and licenses for mining purposes or the prospecting and exploration of minerals" (p. 37, Mbwambo, (2015)).	Yes "[Ministry of Natural Resources and Tourism] Authority to receive, consider and make decisions on applications for land concessions in national and general land forest reserves and for applications of over 200 ha in local authority or village land forest reserves. [Prime Minister's Office-Regional Administration and Local Government] Authority to receive, consider and make decisions on applic…	No "Although the legislation establishing local government authorities clearly stipulates their functions, most services and infrastructure are still being provided by the central government or its executive agencies. The budgeting system is still centralized with funds coming from the central government. However, although these functions are legislatively assigned to the local government, most s…	No "MANG_AUTH: Marine Parks and Reservces Unit; with participatio from an Advisory Committee (key stakeholder groups) and village councils affected by the MPA " (World Database on Protected Areas, UN Environment, 2017). "[National] Authority to establish and gazette protected areas" ((p. 35, Mbwambo (2015)).	No "Only the Ministry of Lands, through the Commissioner of Lands, has the authority to issue grants of occupancy" (Landlinks, 2016).	Yes " [Regional] Authority to develop land-use management plans for approval by the commissioner of lands. [Regional] Authority to implement approved urban land-use and management plans" (p. 29, Mbwambo (2015)).	Yes "The basic functions and duties of local government authorities are established in Section 111 (1-2) of the Local Government (District Authorities) Act of 1982. One of the functions stipulated in 111(1)(a) is to further the national policies and plans for rural and urban development" (p. 17, Mbwambo (2015)).
Laos	2.80025e+09	0.933554	17 Provinces and 1 prefecture (The World Factbook, 2018)	141 Districts "Currently there are 16 provinces (and two equivalent administrative units – Vientiane Prefecture and Saysomboun Special Zone), 141 districts and 11,229 villages" (ICEM, 2003).	11,229 Villages "Currently there are 16 provinces (and two equivalent administrative units – Vientiane Prefecture and Saysomboun Special Zone), 141 districts and 11,229 villages" (ICEM 2003).	1 = National 2 = Provinces/Cities 3 = Districts/Municipalities 4 = Villages "The Lao People’s Democratic Republic is divided into three levels of local administration, namely provinces, districts and villages. The provincial level consists of provinces and cities; The district level consists of districts and municipalities; The village level consists of villages" (The Constitute Project, 2019).	No "The President of the State has the following rights and duties: To appoint, transfer or remove provincial and city governors based on the recommendation of the Prime Minister" (Constitute Project, 2019). "The head of the provincial administration is the governor...Each governor or mayor is the chief of the [relevant] provincial or city administration and represents the province or city. He is…	Yes "Currently, the bulk of revenues are collected at the provincial level (Chart 2). About two-thirds of total revenues are collected by provinces. All import duties, natural resource taxes, timber royalties and more than half of profit and income taxes, turnover and excises are collected by the provinces" (Nakabayashi et al, 2006).	Yes "The decree was meant to develop a “bottom-up” approach to budget planning, with the center retaining control over budget execution. In practice, many of the most powerful provinces interpreted the decree as a mandate to take on greater responsibility for revenue administration and budget management in their jurisdictions" (Nakabayashi et al, 2006). "From 1986-1991, decentralization further d…	No "Role of the Police and Security Apparatus - The Ministry of Public Security maintains internal security but shares the function of external security with the Ministry of Defense’s security forces and with the LPRP and the LPRP’s mass organizations. The Ministry of Public Security oversees local, traffic, immigration, and security police, village police auxiliary, plus other armed police units…	Yes "subordinate courts: appellate courts; provincial, municipal, district, and military courts" (The World Factbook, 2018).	No "It [1990 Law on Property] also establishes that ownership of all land, underground resources, water, forests and wild animals is vested in the state [central government], though the state may grant rights of possession, use, transfer and inheritance to other entities...All land in Lao PDR is state property" (Landlinks, 2013).	Yes "The district or municipal administration is charged with considering and approving the allocation of agricultural land use rights in respect of agricultural land that is under its management to individuals and organisations for use by issuing land certificates to them. These land certificates are valid for three years. During this period, if land has been used in conformity with objectives a…	No "The Department of Geology and Mines [of the Ministry of Energy and Mines] has been responsible for the following: assisting in creating regulations supporting the 2008 Minerals Law; ensuring progress in geological surveys and mapping; negotiating all mining contracts and issuing licenses; promoting investment in the mineral sector; and undertaking mineral exploration and analytical services" …	Yes "PAFO [Provincial Agricultural and Forestry Office] also issues permits for logging and harvesting NTFPs [non-timber forest products] according to the notice of the Ministry of Agriculture and Forestry. MoNRE [Ministry of Natural Resources and Environment] is also technically in charge of approving all land concessions other than those for mining projects" (Landlinks, 2013).	Yes "The implementation of road maintenance, upgrading, and construction contracts in Lao PDR is primarily the responsibility of the provincial Departments of Public Works and Transport (DPWT). At the national level, the Ministry of Public Works and Transport (MoPWT) is responsible for the overall planning of the road network and overseeing the provincial DPWTs. In addition to procuring and super…	No "GOV_TYPE: Not reported; Sub-national ministry or agency [MANG_AUTH = Not reported" (World Database on Protected Areas, UN Environment, 2017) "The management of most forests in Lao PDR, including those designated as NPAs [national protected areas], is the responsibility of the Ministry of Agriculture and Forestry (MAF). Responsibility for NPAs flows from MAF down through its Department of Fore…	Yes "Collective/communal land is further defined in Instruction 564 as land belonging to co-operatives and communal organizations or village lands commonly used by groups of people or ethnic groups in a village... Later, the governor of Vientiane province issued communal land titles in 2012" (Kenney-Lazar, 2017). "Forest officials at district and provincial levels, who are primarily responsible f…	No "In an effort to address deforestation and degradation of forestland, the GOL [Government of Laos] established a National Land Management Authority (LMA) in the Prime Minister’s Office. The LMA is charged with conducting land-use planning at the national and provincial levels and to provide support to districts and villages for planning at their respective levels" (Landlinks, 2013). "It [centr…	Yes "Each governor [head of province] or mayor [head of district] shall have the following authorities and duties: To implement the socio-economic development plan..." (Decree of the President of the Lao People's Democratic Republic on the Promulgation of the Law on Local Administration, 2003).
Mozambique	2.57796e+09	0.944563	11 Provinces "Mozambique is a unitary country divided into 11 provinces and 53 municipalities" (SNG WOFI, 2019).	154 Districts "The provinces are further subdivided into 154 districts which correspond to deconcentrated administrative entities" (SNG WOFI, 2019).	53 Municipalities "Mozambique is a unitary country divided into 11 provinces and 53 municipalities" (SNGWOFI, 2019).	1 = National 2 = Provinces/Capital City 3 = Districts 4 = Municipalities	No "In addition, he [President of the Republic] shall have power to appoint, exonerate and dismiss: the Provincial Governors " (Constitute Project, 2019).	Yes "For provinces and districts, own-revenues are low and central government transfers dominate as the main revenue source...Overall, there is limited tax collection at the provincial level, at only 2.5 percent of total revenues, and a still smaller, insignificant share of district revenues at 1.4 percent" (World Bank, 2014).	Yes "Planning and budgeting is done on the basis of the territorial unit, i.e. at the provincial and district levels. The central government issues a budget limit to the provinces around February, which in practice is largely the same as the year before, as part of the elaboration of the CFMP. The province then distributes budget limits to provincial directorates and districts based on central go…	No "The police service in Mozambique falls under the control of the Ministry of Interior and is called the Polícia da República da Moçambique, which translates to Mozambique Republic Police (MRP) in English. The MRP is a national body that falls under the control of the Ministry of the Interior and is headed by a General Commander, who is appointed by the President" (APCOF, 2019).	Yes "subordinate courts: Administrative Court (capital city only); provincial courts or Tribunais Judicias de Provincia; District Courts or Tribunais Judicias de Districto; customs courts; maritime courts; courts marshal; labor courts; community courts" (The World Factbook, 2018).	No "The 2004 Constitution of Mozambique provides that the ownership of all lands and natural resources vests in the state, and that all Mozambicans shall have the right to use and enjoy land as a means for the creation of wealth and social wellbeing" (Landlinks, 2018).	Yes "Currently, Mozambique’s only legally recognised form of land tenure right is the direito de uso e aproveitamento da terra or DUAT – a state-granted land right. A DUAT can be acquired in three ways: • Recognition of long-standing occupancy: • Customary (traditional) occupation: the occupation of land by individual persons and by local communities, in accordance with customary norms and practi…	No "The Ministry of Mineral Resources and Energy (MIREME) oversees mining activities and hydrocarbon exploitation, including the issuance of permits" (Landlinks, 2018).	Yes "The Provincial Forests and Wildlife Services Office under the control of the Provincial Directorate of Lands, Environment and Rural Development is responsible for cutting licenses, forest concessions and implementation of forestry laws at the provincial level " (Landlinks, 2018).	Yes "Main responsibilities sectors and subsectors - Provinces- Economic affairs/transports; Road network" (SNGWOFI, 2019).	No "GOV_TYPE: Collaborative governance; Federal or national ministry or agency; Local communities; Not reported [MANG_AUTH = National Agency for Conservation Areas; Not reported; National Forestry and Land Directorate " (World Database on Protected Areas, UN Environment, 2017)	No "A DUAT [DUAT from the Portuguese Direito de Uso e Aproveitamento dos Terras, or the ‘the right of land use and benefit of land’ ] protects the customary rights of communities to their traditional territories and recognizes the land rights of communities and individuals acquired through customary systems and good faith occupancy, even without formal documentation of those rights... The DUAT is…	Yes "At National level, territorial planning falls under the jurisdiction of the National Directorate of Territorial Planning from the Ministry of Land, Environment and Rural Development (MITADER). At Provincial level, it is governed by the Provincial Directorate of Land, Environment and Rural Development. At District level, this responsibility fall under the District Services for Planning and In…	Yes "Main responsibilities sectors and subsectors - Provinces- Housing and community amenities; Regional and town planning" (SNGWOFI, 2019).
Guyana	2.53222e+09	0.955376	10 Regions "Regional development councils (RDCs) operate as devolved offices of national government delivering services on its behalf" (CLGF, 2017). "Parliament may provide for the division of Guyana (save for any areas excluded by it) into ten regions and into such sub-regions and other subdivisions as it may deem fit for the purpose of organising local democratic organs" (Constitute Project, 20…	6 Municipal 65 NDCs (neighborhood democratic councils) 75 AVCs (Amerindian village councils) "There are three types of local government operating in Guyana: six municipalities, 65 NDCs and 75 AVCs" (CLGF, 2017).	-	1 = National 2 = Regions 3 = Local government [municipal, neighborhood, and Amerindian village]	Yes "Members of a regional democratic council shall be elected by persons residing in the region and registered as electors for the purpose of article 159" (Constitute Project, 2019).	Yes "Parliament may provide for regional democratic councils to raise their own revenues and to dispose of them for the benefit and welfare of their areas" (Constitute Project, 2019)	Yes "The budget-making process uses a bottom-up approach. For the MOC [Ministry of Communities], this begins with the regional democratic councils submitting regional budgets, including health budgets, to the MOC. With the MOPH [Ministry of Public Health], department heads submit departmental budgets to the Minister of Public Health, who consolidates them. Once the MOC and MOPH have consolidated …	No "The Guyana Police Force is the primary law enforcement agency in Guyana" (The Law on Police Use of Force, 2019). "There shall be established in Guyana a Police Force to be known as the Guyana Police Force. The Force shall be employed for the prevention and detection of crime, the preservation of law and order...the apprehension of offenders and the due enforcement of all laws and regulations …	No "subordinate courts: Land Court; magistrates' courts" (The World Factbook, 2018)	No "Land in Guyana is owned either by the State or under private freehold tenure" (UN-GGIM, 2018).	No "While the Commissioner of Lands and Surveys is the custodian of all State lands, the Guyana Lands and Surveys Commission in accordance with the State Lands Act and Regulations, the Guyana Forestry Commission, under Act 2 of 1979, and the Guyana Geology and Mines Commission, under the Act 9 of 1979, administer land use for agriculture (and other purposes), forestry and mining throughout Guyana…	No "Subject to this Act or the Forests Act, the President may - (b) grant leases of any State lands of Guyana for such terms... (c) subject to paragraphs (e) and (f), authorize the Commissioner to issue licenses to occupy any State lands for any of the following purposes, namely, agriculture or taking or obtaining any substance of thing found in those lands, or any other purpose beneficial to the…	No "For the commercial harvest of timber, the Guyana Forestry Commission issues permits to concessionaires. The four types of permit include: Timber Sales Agreements (TSA): issued for concessions of more than 24,000 hectares and allocated for 20 years Wood Cutting Lease (WCL): issued for concessions between 8,000 and 24,000 hectares and allocated for 3 to 10 years. State Forest Permissions (SFP):…	No "(The Public Lands (Private Roads) Act was consolidated in 1998. The Act allows the minister the ability to give permission for the construction of roads on public land where necessary or useful for mining, woodcutting etc" (Forest Legality, 2016).	No "GOV_TYPE: Local communities [MANG_AUTH = Kanashen Village Council, Joint governance [MANG_AUTH = Iwokrama International Center for Rainforest Conservation and Development], and Federal/National Ministry or Agency [MANG_AUTH = Protected Areas Commission] " (World Database on Protected Areas, UN Environment, 2017).	No "There are hereby established the following Commissions, the goals of which are to strengthen social justice and the rule of law-the Indigenous Peoples' Commission. The Indigenous People s' Commission shall establish mechanisms to enhance the status of indigenous peoples and to respond to their legitimate demands and needs" (Constitute Project, 2019). "Creation of a list of forests sacred to I…	No "GLSC [Guyana Lands and Surveys Commission] - Surveying, Land Administration, Land Information and Mapping GIS, Land Policy and Planning" (UN-GGIM, 2018).	Yes "The development programme of each region shall be integrated into the national development plans, and the Government shall allocate funds to each region to enable it to implement its development programme" (Constitute Project, 2019).
China	2.29347e+09	0.965171	31 Province-level governments	334 Prefectures	2852 Counties	1 = National 2 = Provinces [includes provinces, autonomous region, municipality, and special administrative region] 3 = Prefectures 4 = County	No "Provinces do not have their own constitutions and do not have the power to appoint their own leaders. The Party’s Organization Department in Beijing manages the appointments and promotions of all provincial Party Secretaries and governors, and routinely moves those provincial leaders from province to province, and in and out of posts in Beijing, to ensure that they do not build up regional po…	No "In China, local governments [provinces, prefecture, county] have no discretionary power to raise taxation" (OECD, 2016).	No "Local people's congresses at and above the county level shall exercise the following functions and powers: (1) to ensure the observance and execution, in their respective administrative areas, of the Constitution and other laws, administrative regulations and the resolutions of the people's congresses and their standing committees at higher levels, and to ensure the implementation of the Stat…	No "The domestic security apparatus includes an 800,000-strong police force under the Ministry of Public Security and a 1.5 million-strong paramilitary force, the People’s Armed Police, which reports to both the Party’s Central Military Commission and, through the Ministry of Public Security, to the State Council. The Party also explicitly denies the judiciary independence, insisting that Party C…	Yes "subordinate courts: Higher People's Courts; Intermediate People's Courts; District and County People's Courts; Autonomous Region People's Courts; International Commercial Courts; Special People's Courts for military, maritime, transportation, and forestry issues" (The World Facbook, 2018).	No "Mineral resources, waters, forests, mountains, grassland, unreclaimed land, beaches and other natural resources are owned by the state, that is, by the whole people, with the exception of the forests, mountains, grassland, unreclaimed land and beaches that are owned by collectives in accordance with the law" (Constitute Project, 2019).	Yes "For agricultural land, a holder of mining rights must submit an application to the local land resources administrative body. Then the administrative body will formulate a land conversion plan (to convert agricultural land into construction land because agricultural land in China cannot be directly expropriated by the government), a land expropriation plan, a land supply plan, and a farmland …	Yes "Prospecting and extraction permits. Prospecting and extraction permits confer on the holder rights to prospect and extract mineral resources in China (mining rights). Mining rights can be obtained by applying to the department in charge of geology and mining at different levels ("competent authorities") or participating in the public bidding process" (Wu et al, 2018). "The establishment of c…	Yes "Harvesting permits are issued by forest authorities at different levels (although all contain broadly the same information): (ii) Provincial forestry departments: provincially owned forest farms, prefectureowned forest farms or enterprises, provincially managed nature reserves or forest parks, non-forestry units. Harvest quota management is a basic practice adopted in China's forest governan…	Yes "The competent departments for communications under the people’s governments at or above the county level shall administer the highways within their own administrative areas; however, the duties of the competent departments for communications under the people’s governments at or above the county level to administer and supervise national highways and provincial highways shall be determined by…	No "GOV_TYPE: Not reported; Federal/National Ministry or Agency [MANG_AUTH = Administration Bureau/Prefecture] " (World Database on Protected Areas, UN Environment, 2017) "Mineral resources, waters, forests, mountains, grassland, unreclaimed land, beaches and other natural resources are owned by the state, that is, by the whole people, with the exception of the forests, mountains, grassland, unre…	Yes "In theory, Chinese law provides for national minorities to exercise regional autonomy, such as Article 114 of the Constitution, which stipulates that the chairman of an autonomous region, or the prefect of an autonomous prefecture or head of an autonomous county, must be a member of the minority ‘exercising regional autonomy in the area concerned’. However, China’s five autonomous regions (G…	Yes "The national spatial plans (land use plans) are created in each of the five levels of the national, the provincial, the prefecture level, the county, and the township level. Province Level: Provincial spatial plan, provincial land use plan. Provincial urban system plan, provincial urban and rural plan" (MLIT, 2017).	Yes "People's congresses and people's governments are established in provinces, municipalities directly under the Central Government, counties, cities, municipal districts, townships, nationality townships and towns. Local people's congresses at and above the county level examine and approve the plans for economic and social development and the budgets of their respective administrative areas, an…
Gabon	2.2175e+09	0.97464	9 Provinces "9 provinces; Estuaire, Haut-Ogooue, Moyen-Ogooue, Ngounie, Nyanga, Ogooue-Ivindo, Ogooue-Lolo, Ogooue-Maritime, Woleu-Ntem" (The World Factbook, 2018).	47 Departments/prefectures (African Development Bank, 2005)	27 Districts (African Development Bank, 2005)	1 = National 2 = Provinces [local government] 3 = Departments [local government] 4 = Districts [local government] "Central Africa’s decentralized systems of government have two different levels of local government: regional and local. They also have two different versions of local government: decentralized and deconcentrated subnational units. The types of structure include provinces, regions, di…	No " Provinces, départements, and districts are headed by a Governor, a Prefect, and a sub-Prefect respectively who are all appointed by the President" (Monkam, 2009).	Yes "Local governments can raise taxes; Local governments can set tax rates- Gabon - Yes" (UNDP, 2018).	No "Finally, the provincial commissions on decentralization (CPD), under the authority of Governors of provinces, has as mandate to see to the harmonization of the economic, social and cultural programs among local governments in each province; and to discuss and formulate written guidance on budget plans and on economic and financial policies related to local governments in each province (Loi No…	No "The National Gendarmerie is a military force under the authority of the President of the Republic, Supreme Chief of the armed forces, and the Minister of National Defense. It is an integral part of the defence and security forces. The National Gendarmerie main tasks: To ensure the direct action of the judicial, administrative and military police. Communication and information sharing between …	No "subordinate courts: Courts of Appeal; county courts; military courts" (The World Factbook, 2018).	No "Gabonese forest land is divided into two main categories: Permanent Forest Estate (PFE) and Rural Forest Domain. the PFE consists of both concessions or Forest Management Units (FMUs) contracted out by the State, but used and managed by individuals or businesses, and protection forests preserved for national parks,etc. To receive an agreement for a FMU concession, the Forest Code requires fut…	No "Rural concessions may be granted ‘at the discretion of the administration’ [central]; Award of a right is through issue of a provisional then final decree of concession by the Council of Ministers, or, if the concessionaire is Gabonese, by prefectural decree" (Wily, 2012).	No "Licensing. Identify the main fiscal/legal model granting rights to explore and produce oil and gas. Contractors are granted rights to explore, develop and produce oil and gas by obtaining both an authorisation from the State [central government] and entering into a contract with MPH [Ministry of Mines, Petroleum and Hydrocarbons] defining the terms of such authorisation" (CMS, 2016). "Conduct…	No "Concession licenses - Legal Authority: Ministry of Water and Forests, Ministry of the Environment" (Nepcon, 2017). "The Ministry of Water and Forests can issue three kinds of permits, one of which is the Sustainable Forest Management Concession (CFAD). CFAD permits can cover a surface area between 50,000-200,000 ha. One logging company can have multiple CFADs, but can hold no more than a tota…	No "Created by the government in 2010, the National Public Works Agency (ANGT) oversees all public building projects in the country...In July 2015 the Council of Ministers decided to abolish the ANGT and create a new agency to replace it, the National Agency for Public Infrastructure Works, which will also encompass the Road Fund, the body previously responsible for the construction and maintenan…	No "GOV_TYPE: Not reported; Federal/National Ministry or Agency [MANG_AUTH = Agence Nationale des Parcs Nationaux; Not reported] " (World Database on Protected Areas, UN Environment, 2017)	No "While other countries vaguely recognize customary land rights, Gabonese law is specific in recognizing only usage rights, and the country doesn’t have specific legislation on Indigenous Peoples either" (Cultural Survival, 2017). "Gabon has not ratified either ILO 169 or the UN Declaration on the Rights of Indigenous Peoples 2007 which would oblige the State to respect customary land and on-la…	No "The U.S. Forest Service is working with Gabon to develop a national land-use plan (LUP). As a first step, Gabon’s key ministries and agencies met to discuss their respective allocations of land for different activities, such as logging, mining, agriculture, communities, and infrastructure, to share data and to work together on an integrated LUP for Gabon. Completion of an integrated LUP repre…	No "There are decentralized government units in provinces and departments... Law 15/96 on decentralization established principles governing responsibilities at the decentralized level, which include: regional development" (IMF, 2006).
Ecuador	2.1595e+09	0.983862	24 Provinces (The World Factbook, 2018)	221 Municipalities	-	1 = National 2 = Provinces 3 = Municipalities	Yes "Each province shall have a provincial council with its seat in the capital of the respective province. Said council shall be comprised of a prefect and a deputy prefect, elected by universal suffrage in the province; mayors or council persons representing the cantons; and representatives elected from among the heads of rural parish boards, pursuant to the law. The prefect shall be the highes…	Yes "Regional, provincial, municipal and metropolitan autonomous governments can create, modify or delete, by their own regulations, taxes and special contributions of general or specific improvements for services that are under their responsibility and for the works to be executed within the scope of their powers or territorial constituency" (OECD, 2016).	Yes "The budgets of the decentralized autonomous governments [rural parish boards, municipal councils, metropolitan councils, provincial councils and regional councils] and those of other public entities shall adhere to regional, provincial, canton and parish plans, respectively, within the framework of the National Development Plan, without detriment to their powers and autonomy. The General Sta…	No "For the development of its activities, the National Police Force shall coordinate its duties with the different levels of decentralized autonomous governments" (Constitute Project, 2019).	Yes "subordinate courts: Fiscal Tribunal; Election Dispute Settlement Courts, provincial courts (one for each province); cantonal courts" (The World Factbook, 2018).	No "Indigenous communities and the state are the primary forest owners in Ecuador, although many private individuals also claim forestland rights, and land rights conflicts are common. In protected areas, the state maintains public ownership of the land; however, indigenous inhabitants are granted legal use rights" (Landlinks, 2011).	No "Land rights are acquired through purchase, inheritance, appropriation, and designation of personal use within communal lands. Land may be titled through Direct Administration or by Convenio (Agreement). The National Institute for Agrarian Development (INDA) is directly responsible for titling by direct administration through local or regional authorities" (Landlinks, 2011).	No "The GOE [Government of Ecuador] owns all mineral rights and controls all mineral activities, either directly or by granting rights to third parties" (Landlinks, 2011).	No "1.2 Concession Licences Current Legislation for Natural Forests and Forest Plantations... Legal authority - Ministry of Environment" (Nepcon, 2017) "Article 5 of the Forest Law 2002 states that promoting and implementing policies relating to the conservation, development, protection, research, management, processing and marketing of forest resources, as well as the natural areas and wildlife,…	Yes "Provincial governments shall have the following exclusive jurisdictions, without detriment to others as established by law: To plan, build and maintain the road network within the scope of the province, not including urban zones" (Constitute Project, 2019).	No "GOV_TYPE: Not reported; [MANG_AUTH = Administración del Parque Nacional Yasuní, Dirección Provincial de Ambiente de Orellana, Ministerio del Ambiente Ecuador] " (World Database on Protected Areas, UN Environment, 2017) "The central State shall have exclusive jurisdiction over: Protected natural areas and natural resources. The national system of protected areas shall guarantee the conservatio…	No "The government has granted ancestral land to specific organized groups including indigenous peoples and AfroEcuadorans recognized by the GOE. The GOE has been progressive in recognizing and formalizing land rights of indigenous groups, but conflicts exist between the state and indigenous groups as they relate to ownership, use, and access rights" (Landlinks, 2011).	Yes "Provincial governments shall have the following exclusive jurisdictions, without detriment to others as established by law: To plan provincial development and draw up the respective land use development and management plans in coordination with national, regional, canton and parish planning" (Constitute Project, 2019).	Yes "Provincial governments shall have the following exclusive jurisdictions, without detriment to others as established by law: To plan provincial development and draw up the respective land use development and management plans in coordination with national, regional, canton and parish planning" (Constitute Project, 2019). "Planning shall underpin territorial management and shall be mandatory fo…
Madagascar	1.89173e+09	0.991941	22 Regions (Humanitarian Data Exchange) "[6 provinces suppressed since 2002] Since the political crisis of 2002 and the subsequent change of government, the decentralized institutions of the province have been suppressed. The future role of autonomous provinces remains uncertain" (The World Bank, 2004).	111 Districts "111 Districts [suppressed]" (The World Bank, 2004).	1558 Communes "[de facto government] The most notable achievement of Madagascar’s decentralization policies was the establishment of 1,392 communes in 1995 (since 2004: 1,558). Local administration has been exposed to several changes in its roles and responsibilities since the beginning of the decentralization process in 1995. The first and most important turn came with the 1998 constitution, whi…	1 = National 2 = Regions [granted constitutional status, but not yet established] 3 = Districts 4 = Communes 5 = Fokontany	Yes "The executive function is exercised by an organ directed by the Head of Province elected by universal suffrage...The Head of Province is the first person responsible for the strategy and the implementation of all actions of the economic and social development of his Province. He is the Head of the Administration of the Province" (Constitute Project, 2018).	No "The centralization of Madagascar’s revenues is higher than in most other low-income countries for which data is available. The central government collects more than 97 percent of total revenues. The only truly decentralized level, the communes, accounts for 2–3 percent of total revenues, out of which almost half is attributable to urban communes... The Ministry of Finance (and Budget) continu…	No "However, neither provincial nor district administrations have significant experience with financial planning as most budget allocations are traditionally decided centrally between the Ministry of Finance and the responsible line ministries. Resources, such as budgets, equipment, or staff, would be put “at the disposal” (mis à la disposition) of provincial governments without further clarifica…	No "There are two police agencies in Madagascar, the National Police responsible for urban areas which falls under the Ministry of Public Security and the Gendarmerie responsible for policing outside urban areas and falls under the Ministry of National Defence" (APCOF, 2019).	No "subordinate courts: Courts of Appeal; Courts of First Instance" (The World Factbook, 2018)	No "Land can be owned by the state [central government], individuals or groups... Under Madagascar’s formal law, all forests except for those on titled land are state property "(Landlinks, 2019).	No "To increase land tenure security broadly, Madagascar initiated the National Land Program in 2005 which aims to simplify the land formalization process. The National Land Program decentralized land management to the commune level through the creation of Local Land Offices (LLOs), through which formal land certification was enabled" (Landlinks, 2019).	No "There are four types of mining permits issued by Madagascar’s cadaster service (BCCM): 1) Exclusive Authorization for Reservation of Area, which is valid for three months, non-renewable, and applies only to exploration; 2) Research Permit, which is valid for five years, can renewed twice, and can be converted to a mining permit; 3) Small-Scale Mining Permit, which is valid for eight years and…	No "Exporting of raw precious wood is illegal according to Malagasy laws, but the government has repeatedly granted exceptions (January 29, 2009 and September 21, 2009) and therefore given cover to a rosewood mafia who deprives local people of their natural heritage. These exceptions are illegal since there hasn’t been any stocking or logging permit issuance since 2002. Past exceptions caused sev…	No "Distribution of Ministerial Functions: Provincial Roads Districts- Planning and monitoring of provincial roads (using Transport Fund). Development planning. Communes above 10,000 inhabitants are formally required to develop and implement urban development plans. These plans should identify such things as future investments, zoning, plans for infrastructure and equipment. Construction permits …	No "GOV_TYPE: Local communities; Sub-national ministry or agency [MANG_AUTH = Blue Ventures Conservation (BV), Wildlife Conservation Society (WCS), Institut Halieutique et des Sciences Marines (IHSM)], Owned by Masoala National Park " (World Database on Protected Areas, UN Environment, 2017). "Since the Durban Vth World Parks Congress in 2003, Madagascar has increased its number of protected area…	No "The legal recognition of customary rights is implemented through the decentralization of land management and the conception of new and local registration process in order to reconcile legitimacy, legality and actual practices. Moreover, local governments (Commune in French) have been granted new powers. The establishment of a local land registry office (guichet foncier) allows them to legaliz…	No " Development planning. Communes above 10,000 inhabitants are formally required to develop and implement urban development plans. These plans should identify such things as future investments, zoning, plans for infrastructure and equipment. Construction permits are provided by the commune on the basis of its urban development plan" (The World Bank, 2004).	Yes "In collaboration with the public and private organs, they [provinces] direct, make dynamic, coordinate and harmonize the economic and social development of the whole Province and assure, as such, the planning, the territorial development and the implementation of all the actions of development" (Constitute Project, 2019).
Suriname	1.88717e+09	1	10 Districts "10 districts (distrikten, singular - distrikt); Brokopondo, Commewijne, Coronie, Marowijne, Nickerie, Para, Paramaribo, Saramacca, Sipaliwini, Wanica" (The World Factbook, 2018)	62 Sub-districts "It should be noted that within each District, the 1987 Constitution also established 62 sub-district jurisdictions, known as Ressorts, each with its own popularly elected representative body, the Ressort Council. In most jurisdictions, however, due to the small population and economic base of most ressort jurisdictions, the system of ressort council system has not functioned ver…	-	1 = National 2 = Districts 3 = Sub-districts	No "The President appoints a District Commissioner for each District (two for Paramaribo), who performs both as chair of the district council and chief executive of the district administration" (Ahmadali, 2005). "In every district there shall be a district administration. The district administration is the Executive organ of the district. 2. The district administration consists of the District Co…	Yes "This was followed in 1989 by more specific enabling legislation, the Law on Regional Bodies (LRB)(SB 1989, No.44), which defined the functions and responsibilities of District governments as well as some preliminary mechanisms for local revenue generation and financial management" (OAS, 2016). "Local government responsibilities are limited, and concentrate on small-scale infrastructure, main…	Yes "As defined in the Law on Regional Bodies, the Districts have a relatively limited mandate: (vi) local planning and budgeting" (Ahmadali, 2005)	No "Suriname’s NCB is part of the ‘Korps Politie Suriname' (KPS) which is the national police force" (Interpol, 2019). "There are three major law enforcement/security entities in Suriname. The largest is the Police Corps (Korps Politie Suriname, KPS). KPS is the department responsible for all traditional policing efforts, and has five branches: 1) the Paramaribo Region Police cover the city limit…	No "subordinate courts: cantonal courts" (The World Factbook, 2018)	No "Suriname's Constitution states that all forested land, except privately owned land (which totals 50,000 hectares), belongs to the state" (Forest Legality, 2016).	No "Land lease (grond huur): This is the only title that can be issued after the 1982 and it is issued for land to be used for habitation, agriculture and animal husbandry, industrial purposes and for special purposes. The nature of the use is specified in the title and permission must be obtained from the government to alter the intended use of the land. Leasehold is real right issued early as 1…	No "The state grants user rights on public forestland for timber harvesting and mining, and licenses for fishing, harvesting of non-timber forest products, and conducting nature research" (Playfair, 2007).	No "Monitoring and Control Activities: Pre-logging - application for license - assessment of application - MIN of RGB [MINISTERIE VAN RUIMTELIJKE ORDENING, GROND- EN BOSBEHEER (Ministry of Spatial Planning, Land, and Forest Management)] SBB [Stichting voor Bosbeheer en Bostoezicht (Foundation for Forest Management and Control; no direct legal authority, but works under the mandate of the Forest S…	Yes "As defined in the Law on Regional Bodies, the Districts have a relatively limited mandate: (i) maintenance of secondary and tertiary infrastructure (roads, drainage, irrigation), public parks and open spaces..." (Ahmadali, 2005).	No "GOV_TYPE: Not reported [MANG_AUTH = Not reported] " (World Database on Protected Areas, UN Environment, 2017) "In 1954 the ‘Nature Protection Act’ was enacted to regulate the establishment of Nature Reserves (NR), as protected areas in Suriname are generally called... The Ministry of Physical Planning, Land and Forest Management (RGB) is responsible for the management of all forested areas in…	No "Suriname is the only country in the Western hemisphere without specific legislation on land rights for indigenous and tribal people" (Forest Legality, 2016). "Indigenous land rights continue to lack recognition from the Suriname state. The Suriname constitution states that natural resources are property of the country as a whole and does not acknowledge communal land rights. Indigenous lands …	No "Unfortunately, land use planning in Suriname is currently in an impasse. No national zoning is taking place, no regional land-use plans are made, no urban destination plans and structure plans are made. If they are made, they are not binding" (Terra Institute, 2003). " The Ministry of PLFM has started up the initiative to develop a new law on spatial planning. They studied Dutch law on spatia…	Yes "As defined in the Law on Regional Bodies, the Districts have a relatively limited mandate: (vi) local planning and budgeting" (Ahmadali, 2005).

## Sheet: Citations
Country
Brazil	“Brazil.” OECD, 2016 https://www.oecd.org/regional/regional-policy/profile-Brazil.pdf	“Brazil.” LandLinks, USAID, 2011. https://www.land-links.org/country-profile/brazil/	The World Factbook: Brazil. Central Intelligence Agency, 1 Feb. 2018, https://www.cia.gov/library/publications/the-world-factbook/	Piancastelli, M. “The Federal Republic of Brazil.” International Association of Centers for Federal Studies. http://www.thomasfleiner.ch/files/categories/Intensivkurs%20III/Brazilg2.pdf	Hudson, Rex A, and Library Of Congress. Federal Research Division. Brazil: A Country Study. Washington, D.C.: Federal Research Division, Library of Congress: For sale by the Supt. of Docs., U.S. G.P.O, 1998. Pdf. Retrieved from the Library of Congress, <www.loc.gov/item/97036500/>.	"Brazil." Nations Encyclopedia, 2019. https://www.nationsencyclopedia.com/Americas/Brazil.html	Farret, Ricardo, Urban and Regional Planning in Brazil, disP - The Planning Review, 37:147, 8-13, 2011, DOI: 10.1080/02513625.2001.10556782	Macaulay, Fiona. Problems of police oversight in Brazil. 2019. https://www.researchgate.net/profile/Fiona_Macaulay2/publication/267937232_Problems_of_police_oversight_in_Brazil/links/557ad78008aee4bf82d59711/Problems-of-police-oversight-in-Brazil.pdf	“Brazil's Constitution of 1988 with Amendments through 2017.” Constitute Project, 12 Aug. 2019, https://www.constituteproject.org/constitution/Brazil_2017.pdf?lang=en.	UNEP-WCMC (2017). World Database on Protected Areas User Manual 1.5. UNEP-WCMC: Cambridge, UK. Available at: http://wcmc.io/WDPA_Manual	Damasceno, Rita, et al. Evolution of Land Rights in Rural Brazil Frameworks for Understanding, Pathways for Improvement. Climate Policy Initiative, Apr. 2017.	McGrath, David. Personal communication. 6 June 2019.
Indonesia	Ardiansyah, F., et al. 2015. Forest and land-use governance in a decentralized Indonesia: A legal and policy review. Occasional Paper #132. Center for International Forestry Research, Bogor, Indonesia.	Indonesia: National Police Reform. ICG Asia Report #13 Jakarta/Brussels (2001)	UNEP-WCMC (2017). World Database on Protected Areas User Manual 1.5. UNEP-WCMC: Cambridge, UK. Available at: http://wcmc.io/WDPA_Manual	“Indonesia.” LandLinks, USAID, 2018. https://www.land-links.org/country-profile/indonesia/	Suwarno, Aritta, et al. “Governance, Decentralisation and Deforestation: The Case of Central Kalimantan Province, Indonesia.” Quarterly Journal of International Agriculture 54, no. 1, 2015, pp. 77–100, pdfs.semanticscholar.org/dd08/9edb9cf9ce0c76788d371e90940ab5850e64.pdf.	Ardiansyah, Tomi. Social Forestry: Definition, Scheme, PIAPS, and Implementation. Foresteract, 2017, foresteract.com/perhutanan-sosial/2/.	Ministry of Agriculture and Spatial Planning, 1 Dec. 2019, www.atrbpn.go.id/Publikasi/Peraturan-Perundangan/Peraturan-Menteri-ATR-Kepala-BPN/peraturan-menteri-agraria-dan-tata-ruangkepala-badan-pertanahan-nasional-nomor-10-tahun-2016-6321.	Hapsari, Nindita and Triyoga Widiastomo. Personal communication. 15 November 2019.
Democratic Republic of the Congo	The World Factbook: Democratic Republic of Congo. Central Intelligence Agency, 1 Feb. 2018, https://www.cia.gov/library/publications/the-world-factbook/	“Democractic Republic of Congo.” LandLinks, USAID, 2010. https://www.land-links.org/country-profile/democratic-republic-congo/	Stearns, J. 2012. "Countries at the Crossroads 2012: Democratic Republic of Congo." Freedom House | Championing Democracy. https://freedomhouse.org/sites/default/files/DR%20Congo%20-%20FINAL_0.pdf	“Congo(Democratic Republic of the)'s Constitution of 2005 with Amendments through 2011.” Constitute Project, 12 Aug. 2019, https://www.constituteproject.org/constitution/Democratic_Republic_of_the_Congo_2011.pdf?lang=en	The Head of State Gives Instructions to the Congolese National Police Provincial Commanders. Digital Congo, 24 Aug. 2018, www.digitalcongo.cd/article-en/5b7fc9c2d691800004ec8b61/	Decree No. 14/018 of 02 August 2014 Laying down the Modalities for Allocating Forest Concessions to Local Communities. Leganet, 2014, www.leganet.cd/Legislation/Droit economique/Code Forestier/D.14.018.02.O8.2014.htm.	Localizing the 2030 Agenda and the SDGs: Strengthening Local Government Action in Central Africa. UNDP, 2018, https://www.undp.org/content/dam/rba/docs/Reports/Localizing the 2030 Agenda and the SDGs_Strengthening Local Government Action in Central Africa_UNDP 2018.pdf.	Desbureaux, Sébastien. Personal communication. 19 Nov 2019.
Bolivia	Hudson, Rex A, et al. Bolivia: A Country Study. Washington, D.C.: Federal Research Division, Library of Congress: For sale by the Supt. of Docs., U.S. G.P.O, 1991. Pdf. Retrieved from the Library of Congress, <www.loc.gov/item/90026427/>.	The World Factbook: Venezuela. Central Intelligence Agency, 1 Feb. 2018, https://www.cia.gov/library/publications/the-world-factbook/	“Bolivia.” LandLinks, USAID, 2011. www.land-links.org/country-profile/bolivia/#land.	"Legal System of Bolivia." Organization of American States https://www.oas.org/juridico/mla/en/bol/en_bol-int-description.pdf	Seeman, M. 2004. "The Bolivian Decentralization Process and the Role of Municipal Associations." HWWA Discussion Paper #271. ISSN 1616-4814. Hambug Institute of International Economics.	“Bolivia (Plurinational State of)'s Constitution of 2009.” Constitute Project, 12 Aug. 2019, https://www.constituteproject.org/constitution/Bolivia_2009.pdf
Colombia	“Colombia's Constitution of 1991 with Amendments through 2005.” Constitute Project, 12 Aug. 2019, https://www.constituteproject.org/constitution/Colombia_2005.pdf	“Colombia.” LandLinks, USAID, 2017. www.land-links.org/country-profile/colombia/#land.	Forest Governance - Colombia. Global Forest Atlas, 2019, globalforestatlas.yale.edu/amazon-forest/forest-governance/forest-governance-colombia.	Ley 99 de 1993. Instituto Humboldt, www.humboldt.org.co/images/documentos/pdf/Normativo/1993-12-22-ley-99-crea-el-sina-y-mma.pdf.	Colombia - Local Government. Nations Encyclopedia, 2019, www.nationsencyclopedia.com/Americas/Colombia-LOCAL-GOVERNMENT.html.	Multi-Level Governance Framework. OECD, www.oecd.org/regional/regional-policy/MLG-Framework-Colombia.pdf.	Robustelli, Tim. Challenges to Rural Land Reform in Colombia: The Need for Change in the Countryside Faces Significant. New America, 15 Oct. 2018, www.newamerica.org/future-property-rights/blog/challenges-rural-land-reform-colombia/.	Project Information Document/ Integrated Safeguards Data Sheet (PID/ISDS). The World Bank, 13 Mar. 2017, documents.worldbank.org/curated/en/412091489780662832/pdf/ITM00184-P162594-03-17-2017-1489780660232.pdf.	Virtudes Militares. Ministry of National Defense, 2015, www.mindefensa.gov.co/irj/portal/Mindefensa/contenido?NavigationTarget=navurl://026b4451b46cf28b4d468adb4776a227.	Colombia. The Law on Police Use of Force Worldwide, 2019, www.policinglaw.info/country/colombia.	“Colombia.” OECD, 2016, https://www.oecd.org/regional/regional-policy/profile-Colombia.pdf	The World Factbook: Colombia. Central Intelligence Agency, 1 Feb. 2018, https://www.cia.gov/library/publications/the-world-factbook/	Ardila, Juan and María Adelaida Fernández Muñoz. Personal communication. 25 November 2019.
Peru	Fernandini, P.W., Sousa, R.F. The distribution of powers and responsibilities affecting forests, land use, and REDD+ across levels and sectors in Peru: A legal study. 2015. Occasional Paper #129. Center for International Forestry Research, Bogor, Indonesia.	Dickovick, J. T. Municipalization as Central Government Strategy: Central-Regional-Local Politics in Peru, Brazil, and South Africa. Publius: The Journal of Federalism, 37(1), 1–25. 2006. doi:10.1093/publius/pjl012	Woolcott, Orison O., et al. “Inverse Association between Altitude and Obesity: A Prevalence Study among Andean and Low-Altitude Adult Individuals of Peru.” Vol. 24, no. 4, 2016, pp. 929–937., doi:10.1002/oby.21401.	Blackman, Allen, et al. “Titling Indigenous Communities Protects Forests in the Peruvian Amazon.” Proceedings of the National Academy of Sciences, vol. 114, no. 16, 2017, pp. 4123–4128., doi:10.1073/pnas.1603290114.	The World Factbook: Peru. Central Intelligence Agency, 1 Feb. 2018, https://www.cia.gov/library/publications/the-world-factbook/	“Peru.” LandLinks, USAID, 2016. www.land-links.org/country-profile/peru/#land.	Monterroso, et al. Guía Práctica Para el Proceso de Titulación de Comunidades Nativas. 2019. Center for International Forestry Research, Bogor, Indonesia.	"Peru's Constitution of 1993 with Amendments through 2009." Constitute Project, 12 Aug. 2019, https://www.constituteproject.org/constitution/Peru_2009.pdf?lang=en	Granados, Renzo Giudice. Personal communication. 25 November 2019.
Papua New Guinea	“Papua New Guinea's Constitution of 1975 with Amendments through 2016.” Constitute Project, 12 Aug. 2019, https://www.constituteproject.org/constitution/Papua_New_Guinea_2016.pdf?lang=en	Papua New Guinea - CLGF. Commonwealth Local Government Forum, 2018, www.clgf.org.uk/regions/clgf-pacific/papua-new-guinea/	Papua New Guinea. Commonwealth Local Government Forum, 2017, www.clgf.org.uk/default/assets/File/Country_profiles/Papua_New_Guinea.pdf.	Conservation and Environment Protection Authority. Papua New Guinea Policy on Protected Areas. 2014, www.pg.undp.org/content/dam/papua_new_guinea/docs/environment%20and%20energy/DEC%20signed%20PNG%20Protected%20Areas%20Policy-lowrespgs.pdf.	Papua New Guinea administrative level 0, 1, 2, and 3 population statistics and gazetteer. Humanitarian Data Exchange, 2019, https://data.humdata.org/dataset/papua-new-guinea-administrative-level-0-1-2-and-3-population-statistics	Mining Tenements in Papua New Guinea. Mineral Resources Authority, 2019, mra.gov.pg/License.	Provincial Governments Administration Act 1997. National Economic and Fiscal Commission, 2019, www.nefc.gov.pg/documents/legislations/Local-level%20Governments%20Administration%20Act%201997.pdf.	Forestry Act 1991. Papua New Guinea Forest Industries Association, 1991, www.fiapng.com/forestry_act_1991.html.	Land Ownership in Papua New Guinea. Tok Pisin English Dictionary, 12 June 2015, www.tokpisin.info/land-ownership-papua-new-guinea/.	Aggarwal, Safia, and Mark Freudenberger. Tenure, Governance, and Natural Resource Management. USAID, Apr. 2013, www.land-links.org/wp-content/uploads/2016/09/Tenure-Governance-and-Natural-Resource-Management.pdf.	Forest Legality, Apr. 2013, forestlegality.org/risk-tool/country/papua-new-guinea.	The World Factbook: Papua New Guinea. Central Intelligence Agency, 1 Feb. 2018, https://www.cia.gov/library/publications/the-world-factbook/
Venezuela	“Venezuela (Bolivarian Republic of)'s Constitution of 1999 with Amendments through 2009.” Constitute Project, 13 Aug. 2019, https://www.constituteproject.org/constitution/Venezuela_2009.pdf	Land Reform in Venezuela. CPIM, Apr. 2006, cpim.org/marxist/200602-land-reform-venezuela-2.pdf.	Forest Governance - Venezuela. Global Forest Atlas, 2019, globalforestatlas.yale.edu/amazon-forest/regional-governance/forest-governance-venezuela.	The World Factbook: Venezuela. Central Intelligence Agency, 1 Feb. 2018, https://www.cia.gov/library/publications/the-world-factbook/
Malaysia	“Malaysia's Constitution of 1957 with Amendments through 2007.” Constitute Project, 12 Aug. 2019, https://www.constituteproject.org/constitution/Malaysia_2007.pdf?lang=en	An Overview of Spatial Policy in Asian and European Countries, MLIT, Mar. 2017, https://www.mlit.go.jp/kokudokeikaku/international/spw/general/malaysia/index_e.html	Abidin, Siti, and Surin Suksuwan. Developing the Protected Areas Master List: Challenges & Lessons Learned. Nov. 2013, www.env.go.jp/en/nature/asia-parks/pdf/wg_y2/APC_youth-6_Siti%20Zuraidah%20Abidin.pdf.	Laws of Malaysia. Attorney General’s Chambers of Malaysia, 1 Oct. 2012, www.agc.gov.my/agcportal/uploads/files/Publications/LOM/EN/Act%20344%20-%20Police%20Act%201967.pdf.	USA International Business Publications. Malaysia Justice System and National Police Handbook. Intl Business Pubns Usa, 2007.	Forest Legality, Apr. 2013, https://forestlegality.org/risk-tool/country/malaysia	“Malaysia.” OECD, 2016, https://www.oecd.org/regional/regional-policy/profile-Malaysia.pdf	The World Factbook: Venezuela. Central Intelligence Agency, 1 Feb. 2018, https://www.cia.gov/library/publications/the-world-factbook/
Zambia	“Zambia's Constitution of 1991 with Amendments through 2016.” Constitute Project, 13 Aug. 2019, https://constituteproject.org/constitution/Zambia_2016.pdf?lang=en	“Zambia.” LandLinks, USAID, 2017. www.land-links.org/country-profile/zambia/#land.	"Zambia Police Service." African Policing Civilian Oversight Forum. https://apcof.org/country-data/zambia/	Zambia Administrative Level 0-2 Boundaries. Humanitarian Data Exchange, 2019, data.humdata.org/dataset/zambia-administrative-boundaries-level-1-provinces-and-level-2-districts-with-census-2010-population.	The World Factbook: Venezuela. Central Intelligence Agency, 1 Feb. 2018, https://www.cia.gov/library/publications/the-world-factbook/
Republic of Congo	“Congo (Democratic Republic of the)'s Constitution of 2005 with Amendments through 2011.” Constitute Project, 12 Aug. 2019, https://www.constituteproject.org/constitution/Democratic_Republic_of_the_Congo_2011.pdf?lang=en	Republic of Congo. IWGIA, 31 Oct. 2011, www.iwgia.org/en/republic-of-congo.	Zongwe, Dunia. The Legal System of the Republic of the Congo. New York University School of Law, Jan. 2014, www.nyulawglobal.org/globalex/Congo_Brazzaville.html.	Forest Legality, Jan. 2014, https://forestlegality.org/risk-tool/country/republic-congo	“Republic of Congo.” OECD, 2016, https://www.oecd.org/regional/regional-policy/profile-Congo.pdf	The World Factbook: Republic of Congo. Central Intelligence Agency, 1 Feb. 2018, https://www.cia.gov/library/publications/the-world-factbook/
Angola	“Angola's Constitution of 2010.” Constitute Project, 12 Aug. 2019, https://www.constituteproject.org/constitution/Angola_2010.pdf?lang=en	“Angola.” LandLinks, USAID, 2010. www.land-links.org/country-profile/angola/#land.	"The National Police Force." African Policing Civilian Oversight Forum. https://apcof.org/country-data/angola/	2.3 Angola Road Network. Logistics Capacity Assessment, 20 July 2018, dlca.logcluster.org/display/public/DLCA/2.3+Angola+Road+Network.	Felicio, Mariana, and Serdar Yilmaz. Angola: Local Government Discretion and Accountability. The World Bank, Oct. 2009, documents.worldbank.org/curated/en/811141467999121070/pdf/514080NWP0AO0L10Box342027B01PUBLIC1.pdf.	"Angola.” OECD, 2016, https://www.oecd.org/regional/regional-policy/profile-Angola.pdf	The World Factbook: Angola. Central Intelligence Agency, 1 Feb. 2018, https://www.cia.gov/library/publications/the-world-factbook/
Mexico	“Mexico.” LandLinks, USAID, 2017. www.land-links.org/country-profile/mexico/#land.	The World Factbook: Mexico. Central Intelligence Agency, 1 Feb. 2018, https://www.cia.gov/library/publications/the-world-factbook/	Gilles, S. 2014. The 2012 Elections in MExico: Return of the Dominant Party." Electoral Studies 34 (June): 349-353.	Merrill, Tim, Ramón Miró, and Library Of Congress. Federal Research Division. Mexico: A Country Study. Washington, D.C.: Federal Research Division, Library of Congress: For sale by the Supt. of Docs., U.S. G.P.O, 1997. Pdf. Retrieved from the Library of Congress, <www.loc.gov/item/97013481/>.	“Mexico's Constitution of 1917 with Amendments through 2015.” Constitute Project, 12 Aug. 2019, https://www.constituteproject.org/constitution/Mexico_2015.pdf?lang=en	“Mexico.” OECD, 2016 https://www.oecd.org/regional/regional-policy/profile-Mexico.pdf	The Governance of Land Use Country Fact Sheet Mexico. OECD, 2017, www.oecd.org/regional/regional-policy/land-use-Mexico.pdf.	UNEP-WCMC (2017). World Database on Protected Areas User Manual 1.5. UNEP-WCMC: Cambridge, UK. Available at: http://wcmc.io/WDPA_Manual	Meyer, Maureen. “Mexico's Police: Many Reforms, Little Progress.” Washington Office on Latin America, May 2014.	Forest Legality, Sep. 2013, https://forestlegality.org/risk-tool/country/central-african-republic-0
Myanmar	“Myanmar's Constitution of 2008.” Constitute Project, 17 Jan. 2018, https://www.constituteproject.org/constitution/Myanmar_2008.pdf?lang=en	“Myanmar.” LandLinks, USAID, 2017. www.land-links.org/country-profile/myanmar/#land.	Government of Republic of the Union of Myanmar. Ministry of Ethnic Affairs. 2019, myanmar.gov.mm/en/ministry-of-ethnic-affairs.	An Overview of Spatial Policy in Asian and European Countries, MLIT, 3 Mar. 2013, https://www.mlit.go.jp/kokudokeikaku/international/spw/general/myanmar/index_e.html	The Asia Foundation. State and Region Governments in Myanmar. Oct. 2018, asiafoundation.org/wp-content/uploads/2018/10/State-and-Region-Governments-in-Myanmar-Full-Report_Eng-version_6-March-2019.pdf.	The World Factbook: Myanmar. Central Intelligence Agency, 1 Feb. 2018, https://www.cia.gov/library/publications/the-world-factbook/
Central African Republic	“Central African Republic.” LandLinks, USAID, 2010. www.land-links.org/country-profile/central-african-republic/#land.	Localizing the 2030 Agenda and the SDGs: Strengthening Local Government Action in Central Africa. UNDP, 2018, https://www.undp.org/content/dam/rba/docs/Reports/Localizing the 2030 Agenda and the SDGs_Strengthening Local Government Action in Central Africa_UNDP 2018.pdf.	The Law on Police Use of Force Worldwide. Central African Republic. 2019, https://www.policinglaw.info/country/central-african-republic. ‌	BTI 2018 Country Report. 2018, www.bti-project.org/en/reports/country-reports/detail/itc/CAF/.	The World Bank. Central African Republic: National Recovery and Peacebuilding Plan 2017-21. 2018, documents.worldbank.org/curated/en/817461516999933538/Central-African-Republic-National-Recovery-and-Peacebuilding-Plan-2017-21.	ACAPS. Central African Republic Country Profile. July 2015, reliefweb.int/sites/reliefweb.int/files/resources/acaps_country_profile_car_27july2015.pdf.	The World Factbook: Central African Republic. Central Intelligence Agency, 1 Feb. 2018, https://www.cia.gov/library/publications/the-world-factbook/
Vietnam	Trung et al. (2015). The distribution of powers and responsibilities affecting forests, land use, and REDD+ across levels and sectors in Vietnam: A legal study. Occasional Paper #137. Center for International Forestry Research, Bogor, Indonesia.	The World Factbook: Vietnam. Central Intelligence Agency, 1 Feb. 2018, https://www.cia.gov/library/publications/the-world-factbook/	“Vietnam.” LandLinks, USAID, 2013. www.land-links.org/country-profile/vietnam/#land.	“Vietnam.” OECD, 2016 https://www.oecd.org/regional/regional-policy/profile-Vietnam.pdf	“Viet Nam's Constitution of 1992 with Amendments through 2013.” Constitute Project, 13 Aug. 2019, https://www.constituteproject.org/constitution/Socialist_Republic_of_Vietnam_2013.pdf?lang=en	UNEP-WCMC (2017). World Database on Protected Areas User Manual 1.5. UNEP-WCMC: Cambridge, UK. Available at: http://wcmc.io/WDPA_Manual	Role, Functions, Missions and Organizational Structure of the People’s Public Security Forces. Ministry of Public Security, 20 Nov. 2018, en.bocongan.gov.vn/about/role-functions-missions-and-organizational-structure-of-the-peoples-public-security-forces-t4337.html.
Thailand	“Thailand.” LandLinks, USAID, 2011. www.land-links.org/country-profile/thailand/#land.	Ngamkham, Wassayos. Royal Guard Jurisdiction Announced. Bangkok Post, 28 Jan. 2019, https://www.bangkokpost.com/thailand/general/1618862/royal-guard-jurisdiction-announced.	Spain, Daphne. “Kingdom of Thailand.” International demographics 2 12 (1983): 4-9 .	The Law on Police Use of Force Worldwide. Thailand. 2019, www.policinglaw.info/country/thailand. ‌	Chardchawarn, Supasawad. Local Governance in Thailand: The Politics of Decentralization and the Roles of Bureaucrats, Politicians, and the People. Institute of Developing Economies, Mar. 2010, www.ide.go.jp/library/English/Publish/Download/Vrf/pdf/459.pdf.	An Overview of Spatial Policy in Asian and European Countries, MLIT, Mar. 2017, https://www.mlit.go.jp/kokudokeikaku/international/spw/general/thailand/index_e.html	Central-Local Government Relations in Thailand. The World Bank, 2012, documents.worldbank.org/curated/en/132321468308958485/pdf/674860v20WP0P10overnment01201102012.pdf.	"Thailand.” OECD, 2016, https://www.oecd.org/regional/regional-policy/profile-Thailand.pdf	The World Factbook: Thailand. Central Intelligence Agency, 1 Feb. 2018, https://www.cia.gov/library/publications/the-world-factbook/	Timber Legality Risk Assessment: Thailand. NEPCon, May 2017, https://www.nepcon.org/sites/default/files/library/2017-06/NEPCon-TIMBER-Thailand-Risk-Assessment-EN-V1.pdf
Cameroon	Localizing the 2030 Agenda and the SDGs: Strengthening Local Government Action in Central Africa. UNDP, 2018, https://www.undp.org/content/dam/rba/docs/Reports/Localizing the 2030 Agenda and the SDGs_Strengthening Local Government Action in Central Africa_UNDP 2018.pdf.	2019 Report World Observatory on Subnational Government Finance and Investment Country Profiles. SNGWOFI, 2019, http://www.sng-wofi.org/publications/SNGWOFI_2019_report_country_profiles.pdf.	Conducting Oil and Gas Activities in Cameroon. CMS, 2016, https://www.extractiveshub.org/servefile/getFile/id/5724.	Délégation Générale à La Sûreté Nationale. APCOF, 2019, https://apcof.org/country-data/cameroon/.	Wily, Liz Alden. Whose Land Is It? The Status of Customary Land Tenure in Cameroon. Fern, Feb. 2011, https://www.fern.org/news-resources/whose-land-is-it-the-status-of-customary-land-tenure-in-cameroon-639/.	Forest Legality, July. 2013, https://forestlegality.org/risk-tool/country/cameroon-0	The World Factbook: Cameroon. Central Intelligence Agency, 1 Feb. 2018, https://www.cia.gov/library/publications/the-world-factbook/	“Cameroon.” LandLinks, USAID, 2011.https://www.land-links.org/country-profile/cameroon/	"Cameroon's Constitution of 1972 with Amendments through 2008." Constitute Project, 12 Aug. 2019, https://www.constituteproject.org/constitution/Cameroon_2008.pdf?lang=en	Localizing the 2030 Agenda and the SDGs: Strengthening Local Government Action in Central Africa. UNDP, 2018, https://www.undp.org/content/dam/rba/docs/Reports/Localizing the 2030 Agenda and the SDGs_Strengthening Local Government Action in Central Africa_UNDP 2018.pdf.	Ernest, Ambe Che. Personal communication. 19 November 2019.
Philippines	“Philippines Constitution of 1987.” Constitute Project, 12 Aug. 2019, https://www.constituteproject.org/constitution/Philippines_1987.pdf?lang=en	“Philippines.” LandLinks, USAID, 2017. www.land-links.org/country-profile/philippines/#land.	The Local Government Code of the Philippines. Chan Robles Virtual Law Library, 2019, http://www.chanrobles.com/localgovfulltext.html#.XfFI-ehKhPY.	The LawPhil Project, 13 Dec. 1990, https://www.lawphil.net/statutes/repacts/ra1990/ra_6975_1990.html.	An Overview of Spatial Policy in Asian and European Countries, MLIT, Mar. 2017, https://www.mlit.go.jp/kokudokeikaku/international/spw/general/philippines/index_e.html.	"Philippines.” OECD, 2016, https://www.oecd.org/regional/regional-policy/profile-Philippines.pdf	The World Factbook: Philippines. Central Intelligence Agency, 1 Feb. 2018, https://www.cia.gov/library/publications/the-world-factbook/
India	“India's Constitution of 1949 with Amendments through 2016.” Constitute Project, 12 Aug. 2019, https://www.constituteproject.org/constitution/India_2016.pdf?lang=en	“India.” LandLinks, USAID, 2019. www.land-links.org/country-profile/india/#land.	Chaturvedi, Rohini. 2016. India's forest federalism, Contemporary South Asia, 24:1, 1-18, DOI: 10.1080/09584935.2015.1132189	An Overview of Spatial Policy in Asian and European Countries, MLIT, Mar. 2017, https://www.mlit.go.jp/kokudokeikaku/international/spw/general/india/index_e.html.	Police Reforms in India . PRS India, June 2017, http://prsindia.org/sites/default/files/parliament_or_policy_pdfs/Police Reforms in India.pdf.	The Wildlife Protection Act, 1972. National Biodiversity Authority , http://nbaindia.org/uploaded/Biodiversityindia/Legal/15. Wildlife (Protection) Act, 1972.pdf.	What Is a Panchayat. Pria, 2018, https://pria.org/panchayathub/panchayat_text_view.php.	Forest Legality, Sep. 2014, https://forestlegality.org/risk-tool/country/india	"India.” OECD, 2016, https://www.oecd.org/regional/regional-policy/profile-India.pdf	The World Factbook: India. Central Intelligence Agency, 1 Feb. 2018, https://www.cia.gov/library/publications/the-world-factbook/	India Legality Framework. 30 Sept. 2016, www.timbertradeportal.com/countries/india/#legality-profile.	Chaturvedi, Rohini. Personal communication. 16 November 2019.
Cambodia	Administration. Open Development Cambodia, 8 Dec. 2015, https://opendevelopmentcambodia.net/topics/administration/.	Cambodia: Transport Sector Assessment, Strategy, and Road Map. Asian Development Bank, Dec. 2011, https://www.adb.org/documents/cambodia-transport-sector-assessment-strategy-and-road-map.	Concessions. Open Development Cambodia, 4 Aug. 2015, https://opendevelopmentcambodia.net/topics/concessions/.	Feldt, Heidi. Land Rights Programme, Cambodia – Knowledge Profiles. 2016, https://www.giz.de/en/downloads/2017_Knowledge Profiles-final.pdf.	Ironside, Jeremy. The Recognition of Customary Tenure in Cambodia . Oct. 2017, https://www.burmalibrary.org/docs23/The-Recognition-of-Customary-Tenure-in-Cambodia-red.pdf.	Niazi, Tariq H. Deconcentration and Decentralization Reforms in Cambodia. Asian Development Bank, 2011, https://www.adb.org/sites/default/files/publication/28879/deconcentration-decentralization-cambodia.pdf.	The World Factbook: Cambodia. Central Intelligence Agency, 1 Feb. 2018, https://www.cia.gov/library/publications/the-world-factbook/	“Cambodia.” LandLinks, USAID, 2011.https://www.land-links.org/country-profile/cambodia/	"Cambodia's Constitution of 1993 with Amendments through 2008." Constitute Project, 12 Aug. 2019, https://www.constituteproject.org/constitution/Cambodia_2008.pdf?lang=en
Tanzania	Mbwambo, L. (2015). The distribution of powers and responsibilities affecting forests, land use, and REDD+ across levels and sectors in Tanzania: A legal study. Occasional Paper #147. Center for International Forestry Research, Bogor, Indonesia.	“Tanzania.” LandLinks, USAID, 2016, www.land-links.org/country-profile/tanzania/	Law, G. (2015). "Districts of Tanzania. Statoids." http://www.statoids.com/ytz.html	"Tanzania Police Force." African Policing Civilian Oversight Forum. https://apcof.org/country-data/tanzania/	The World Factbook: Tanzania. Central Intelligence Agency, 1 Feb. 2018, https://www.cia.gov/library/publications/the-world-factbook/	“Tanzania.” OECD, 2016 https://www.oecd.org/regional/regional-policy/profile-Tanzania.pdf	UNEP-WCMC (2017). World Database on Protected Areas User Manual 1.5. UNEP-WCMC: Cambridge, UK. Available at: http://wcmc.io/WDPA_Manual
Laos	“Laos.” LandLinks, USAID, 2013. www.land-links.org/country-profile/laos/	The World Factbook: Laos. Central Intelligence Agency, 1 Feb. 2018, https://www.cia.gov/library/publications/the-world-factbook/	“Lao People's Democratic Republic's Constitution of 1991 with Amendments through 2003 ” Constitute Project, 12 Aug. 2019, https://www.constituteproject.org/constitution/Laos_2003.pdf?lang=en	Nakabayashi, Shinichi, et al. Lao People’s Democratic Republic: Selected Issues and Statistical Appendix . International Monetary Fund (IMF), 27 Feb. 2006, https://www.imf.org/external/pubs/ft/scr/2006/cr06398.pdf.	Moving Forward: Developing Highway PPPs in Lao PDR. Public-Private Infrastructure Advisory Facility (PPIAF), 2013.	Kenney-Lazar, Miles. Governing Communal Land in the Lao PDR. Ministry of Agriculture and Forestry, Department of Agricultural Land Administration , 2017, https://www.ohchr.org/Documents/Issues/EPoverty/Lao/MilesKenneyLazarAnnex4.pdf.	Economic Outlook for Southeast Asia, China and India 2014: Beyond the Middle-Income Trap, OECD, 2013, https://doi.org/10.1787/saeo-2014-en.	Law on Local Administration of the Lao People's Democratic Republic. Law Committee of the National Assembly of the Lao PDR, 21 Oct. 2003, http://www.vientianetimes.org.la/Laws in English/49. Law on Local Administration (2003) Eng.pdf.	Laos 2017 Human Rights Report. United States Department of State, Bureau of Democracy, Human Rights and Labor, 2017, https://www.state.gov/wp-content/uploads/2018/04/Laos.pdf.	Hanpaseuth, Bor. Rural Development and Decentralization in Lao People's Democratic Republic. Parliamentary Institute of Cambodia (PIC), 2016, https://www.pic.org.kh/images/2016Research/20170404 Lao Rural Development_Eng.pdf.	Lao People’s Democratic Republic National Report on Protected Areas and Development. ICEM, 2003, http://www.mekong-protected-areas.org/lao_pdr/docs/lao_pdr_nr.pdf.	Law on Local Administration of the Lao People's Democratic Republic. Law Committee of the National Assembly of the Lao PDR, 21 Oct. 2003, http://www.vientianetimes.org.la/Laws in English/49. Law on Local Administration (2003) Eng.pdf.	Decree of the President of the Lao People's Democratic Republic on the Promulgation of the Law on the Amended Land Law. Law Committee of the National Assembly of the Lao PDR , 21 Oct. 2003, http://www.vientianetimes.org.la/Laws in English/33. Law on Land_Decree (2003) Eng.pdf.	Decree of the President of the Lao People's Democratic Republic on the Promulgation of the Law on Local Administration. Law Committee of the National Assembly of the Lao PDR , 21 Oct. 2003, http://www.vientianetimes.org.la/Laws%20in%20English/49.%20Law%20on%20Local%20Administration%20(2003)%20Eng.pdf
Mozambique	2019 Report World Observatory on Subnational Government Finance and Investment Country Profiles. SNGWOFI, 2019, http://www.sng-wofi.org/publications/SNGWOFI_2019_report_country_profiles.pdf.	Locke, Anna. Mozambique Land Policy Development Case Study . Overseas Development Institute , Mar. 2014.	Monteiro, Jose., et al. Territorial Planning at Community Level in Mozambique: Opportunities and Challenges in a Context of Community Land Delimitation. 2017, http://www.itc.co.mz/wp-content/uploads/2018/07/Territorial-Planning-at-Community-level-Challenges-and-opportunities.pdf.	Mozambique - Public Expenditure Review : Addressing the Challenges of Today, Seizing the Opportunities of Tomorrow. The World Bank, 1 Sept. 2014, http://documents.worldbank.org/curated/en/677921468275102771/Mozambique-Public-expenditure-review-addressing-the-challenges-of-today-seizing-the-opportunities-of-tomorrow.	Polícia Da República Da Moçambique. APCOF, 2019, https://apcof.org/country-data/mozambique/.	The World Factbook: Mozambique. Central Intelligence Agency, 1 Feb. 2018, https://www.cia.gov/library/publications/the-world-factbook/	“Mozambique.” LandLinks, USAID, 2013. www.land-links.org/country-profile/mozambique/	"Mozambique's Constitution of 2004 with Amendments through 2007 ." Constitute Project, 12 Aug. 2019, https://www.constituteproject.org/constitution/Mozambique_2007.pdf?lang=en
Guyana	“Guyana's Consitution of 1980 with Amendments through 2016.” Constitute Project, 12 Aug. 2019, https://www.constituteproject.org/constitution/Guyana_2016.pdf?lang=en	Cooperative Republic of Guyana National Forest Plan 2018. Ministry of Natural Resources, 2018, https://forestry.gov.gy/wp-content/uploads/2018/02/Guyana-National-Forest-Plan-10-1-2018.pdf.	Guyana. CLGF, 2017, http://www.clgf.org.uk/default/assets/File/Country_profiles/Guyana.pdf.	Guyana. The Law on Police Use of Force, 2019, https://www.policinglaw.info/country/guyana.	Guyana’s Budget Process and Windows for Advocacy. Health Policy Plus, May 2018, http://www.healthpolicyplus.com/ns/pubs/8217-8381_GuyanaBudgetBrief.pdf.	Land Administration in Guyana. UN-GGIM, Sept. 2018, http://ggim.un.org/meetings/2018-Deqing-International-Seminar/documents/4.2Durwin-Humphrey.pdf.	Laws of Guyana. The Red Desk, https://theredddesk.org/sites/default/files/state_lands_act_1.pdf.	Forest Legality, Feb. 2016, https://forestlegality.org/risk-tool/country/guyana	The World Factbook: Guyana. Central Intelligence Agency, 1 Feb. 2018, https://www.cia.gov/library/publications/the-world-factbook/	Kalamandeen, Michelle. Personal communication. 26 November 2019.
China	“Organic .” Laws of the People's Republic of China, Asian Legal Information Institute, 2019, http://www.asianlii.org/cn/legis/cen/laws/olotlpcalpgotproc908/.	Land Administration Law of the People's Republic of China. CECC, 29 Aug. 1998, https://www.cecc.gov/resources/legal-provisions/land-administration-law-of-the-peoples-republic-of-china-0.	Wu, Guohua, and Yingnan Li. China: Mining 2020. The International Comparative Legal Guides (ICLG), 10 Feb. 2019, https://iclg.com/practice-areas/mining-laws-and-regulations/china.	Lawrence, Susan V., and Michael F. Martin. Understanding China's Political System. Congressional Research Service, 20 Mar. 2013, https://fas.org/sgp/crs/row/R41007.pdf.	China. Minority Rights Group International , Nov. 2017, https://minorityrights.org/country/china/.	“China.” An Overview of Spatial Policy in Asian and European Countries, MLIT, Mar. 2017, https://www.mlit.go.jp/kokudokeikaku/international/spw/general/china/index_e.html.	Highway Law of the People's Republic of China, National People's Congress, 2007, http://www.npc.gov.cn/zgrdw/englishnpc/Law/2007-12/11/content_1383545.htm.	Wu, Guohua., et al. Mining in China: Overview. Thomson Reuters, 2018, https://uk.practicallaw.thomsonreuters.com/w-011-1348?transitionType=Default&contextData=(sc.Default)&firstPage=true&bhcp=1.	The World Factbook: China. Central Intelligence Agency, 1 Feb. 2018, https://www.cia.gov/library/publications/the-world-factbook/	"China (People’s Republic of)'s Constitution of 1982 with Amendments through 2004." Constitute Project, 25 Nov. 2019, https://www.constituteproject.org/constitution/China_2004.pdf?lang=en	Timber Legality Risk Assessment: China. NEPCon, May 2017, https://www.nepcon.org/sites/default/files/library/2017-06/NEPCon-TIMBER-China-Risk-Assessment-EN-V1.pdf
Gabon	Timber Legality Risk Assessment: Gabon. NEPCon, May 2017,https://www.nepcon.org/sites/default/files/library/2017-06/NEPCon-TIMBER-Gabon-Risk-Assessment-EN-V1.pdf	Conducting Oil and Gas Activities in Gabon. CMS Law, 2016.	Republic of Gabon Country Governance Profile. African Development Bank, Oct. 2005, https://www.afdb.org/fileadmin/uploads/afdb/Documents/Project-and-Operations/ADB-BD-IF-2005-229-EN-GABON-GOVERNANCEPROFILE-06-12-05.PDF.	Observations on the State of Indigenous Human Rights in Gabon Prepared for: The 28th Session of the United Nations Human Rights Council Universal Periodic Review March 2017 . Cultural Survival, Mar. 2017, https://www.culturalsurvival.org/sites/default/files/GabonUPRReport2017.pdf.	Sharing Our Successes: Supporting Sustainable Forest Management in Gabon . EC-LEDS, 18 May 2018, https://www.ec-leds.org/countries/gabon.	Gendarmerie Nationale. Global Security, 2019, https://www.globalsecurity.org/military/world/africa/gb-gendarmerie.htm.	Gabon: Report on Observance of Standards and Codes - Fiscal Transparency Module. IMF, Oct. 2006, https://www.imf.org/en/Publications/CR/Issues/2016/12/31/Gabon-Report-on-Observance-of-Standards-and-Codes-Fiscal-Transparency-Module-20052.	Monkam, Nara. Property Taxation in Francophone Central Africa: Case Study of Gabon. Lincoln Institute of Land Policy, 2009, https://www.lincolninst.edu/sites/default/files/pubfiles/1599_816_WP09FAA2.pdf.	Localizing the 2030 Agenda and the SDGs: Strengthening Local Government Action in Central Africa. UNDP, 2018, https://www.undp.org/content/dam/rba/docs/Reports/Localizing the 2030 Agenda and the SDGs_Strengthening Local Government Action in Central Africa_UNDP 2018.pdf.	Wily, Liz Alden. Land Rights in Gabon: Facing up to the Past - and Present. FERN, Apr. 2012, https://www.fern.org/fileadmin/uploads/fern/Documents/fern_gabon_LR_EN_0.pdf.	Forest Legality, 2014, https://forestlegality.org/risk-tool/country/gabon	The World Factbook: Gabon. Central Intelligence Agency, 1 Feb. 2018, https://www.cia.gov/library/publications/the-world-factbook/	The Report: Gabon 2015. Oxford Business Group, 8 Dec. 2015.
Ecuador	Timber Legality Risk Assessment: Ecuador. NEPCon, May 2017, https://www.nepcon.org/sites/default/files/library/2017-06/NEPCon-TIMBER-Ecuador-Risk-Assessment-EN-V1.pdf	Forest Legality, Sep 2014, https://forestlegality.org/risk-tool/country/ecuador	"Ecuador.” OECD, 2016, https://www.oecd.org/regional/regional-policy/profile-Ecuador.pdf	The World Factbook: Ecuador. Central Intelligence Agency, 1 Feb. 2018, https://www.cia.gov/library/publications/the-world-factbook/	“Ecuador.” LandLinks, USAID, 2011. https://www.land-links.org/country-profile/ecuador/	"Ecuador's Constitution of 2008." Constitute Project, 12 Aug. 2019, https://www.constituteproject.org/constitution/Ecuador_2008.pdf
Madagascar	Stop Illegal Logging in Madagascar, Now! World Wide Fund for Nature, 4 Oct. 2010, https://wwf.panda.org/?195404/Stop-illegal-logging-in-Madagascar-NOW.	Decentralization in Madagascar. The World Bank, 2004. http://documents.worldbank.org/curated/en/884421468055158895/Decentralization-in-Madagascar	Burnod, Perrine., et al. Land Reform and Certification in Madagascar: Does Perception of Tenure Security Matter and Change? The World Bank, 2012, https://agritrop.cirad.fr/565463/1/document_565463.pdf.	Madagascar National Police. African Policing Civilian Oversight Forum , 2019, https://apcof.org/country-data/madagascar/.	The World Factbook: Madagascar. Central Intelligence Agency, 1 Feb. 2018, https://www.cia.gov/library/publications/the-world-factbook/	“Madagascar.” LandLinks, USAID, 2019.https://www.land-links.org/country-profile/madagascar/	"Madagascar's Constitution of 2010." Constitute Project, 12 Aug. 2019, https://www.constituteproject.org/constitution/Madagascar_2010.pdf	Dave, Radhika. Personal communication. 22 November 2019.
Suriname	The World Factbook: Suriname. Central Intelligence Agency, 1 Feb. 2018, https://www.cia.gov/library/publications/the-world-factbook/	Ahmadali, Basharat. “Guideline Decentralization 2003 - 2006.” Decentralisatie, Ministry of Regional Development , Sept. 2005, http://decentralisatie.org/oldsite/20dlgp/g13_Guideline_Decentralization.pdf.	“Observations on the State of Indigenous Human Rights in Suriname In Light of the UN Declaration on the Rights of Indigenous Peoples Prepared for United Nations Human Rights Council: Universal Periodic Review.” Cultural Survival, Cultural Survival, 21 Sept. 2015, https://www.culturalsurvival.org/sites/default/files/media/surinameuprreportfinal.pdf.	Country Program Evaluation: Suriname 1980-2004 . Inter-American Development Bank, Oct. 2006.	Suriname: Tackling Suriname Crime. Interpol, 2019, https://www.interpol.int/en/Who-we-are/Member-countries/Americas/SURINAME.	Dougal, Martin., et al. Governance in Suriname. Inter-American Development Bank, Apr. 2001.	Observatory on Strategies and Mechanisms for Effective Public Management Suriname. Organization of American States, Jan. 2016, https://www.oas.org/es/sap/dgpe/gemgpe/Suriname/Suriname.pdf.	Suriname 2019 Crime & Safety Report. Overseas Security Advisory Council, Bureau of Diplomatic Security, U.S. Department of State, 7 May 2019, https://www.osac.gov/Country/Suriname/Content/Detail/Report/9e0f11c9-f486-43c8-8847-15f4aecd04a5.	Playfair, Maureen. Law Compliance and Prevention and Control of Illegal Activities in the Forest Sector in Suriname. The World Bank, 2007, https://www.profor.info/sites/profor.info/files/LAC_2007_Law Compliance_Prevention and Control of Illegal Activities in the Forest Sector of Suriname_0.pdf.	Land Policy, Administration and Management: The Suriname Experience. Terra Institute, 19 Mar. 2003, http://www.discover-suriname.com/downloads/surinameces.pdf.	Suriname Securing Indigenous People's Rights in Conservation in Suriname: A Review. VIDS and Forest Peoples Programme, Oct. 2009, https://www.forestpeoples.org/sites/fpp/files/publication/2010/04/wccsurinamepareviewoct09eng.pdf.	Boxtel, Merel van. The Road to Planning, Setting a Course: An Institutional Analysis of Spatial Planning in Suriname. Wageningen University , May 2010, https://edepot.wur.nl/139569.	Forest Legality, Feb. 2016, https://forestlegality.org/risk-tool/country/suriname	"Suriname's Constitution of 1987 with Amendments through 1992." Constitute Project, 13 Aug. 2019, https://www.constituteproject.org/constitution/Surinam_1992.pdf?lang=en	Kalamandeen, Michelle. Personal communication. 26 November 2019.
		‌
